RESEARCH ARTICLE

# *GhWRKY68* Reduces Resistance to Salt and Drought in Transgenic *Nicotiana benthamiana*

Haihong Jia, Chen Wang, Fang Wang, Shuchang Liu, Guilin Li, Xingqi Guo\*

State Key Laboratory of Crop Biology, College of Life Sciences, Shandong Agricultural University, Tai'an, Shandong, PR China

\* [xqguo@sdau.edu.cn](mailto:xqguo@sdau.edu.cn)

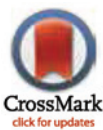

**OPEN ACCESS**

**Citation:** Jia H, Wang C, Wang F, Liu S, Li G, Guo X (2015) *GhWRKY68* Reduces Resistance to Salt and Drought in Transgenic *Nicotiana benthamiana*. PLoS ONE 10(3): e0120646. doi:10.1371/journal.pone.0120646

**Academic Editor:** Ji-Hong Liu, Key Laboratory of Horticultural Plant Biology (MOE), CHINA

**Received:** October 9, 2014

**Accepted:** January 25, 2015

**Published:** March 20, 2015

**Copyright:** © 2015 Jia et al. This is an open access article distributed under the terms of the [Creative Commons Attribution License](https://creativecommons.org/licenses/by/4.0/), which permits unrestricted use, distribution, and reproduction in any medium, provided the original author and source are credited.

**Data Availability Statement:** All relevant data are within the paper and its Supporting Information files.

**Funding:** This work was financially supported with two fundings from the National Natural Science Foundation of China (Grant no. 31171837; 31471424). The funders had no role in study design, data collection and analysis, decision to publish, or preparation of the manuscript.

**Competing Interests:** The authors have declared that no competing interests exist.

## Abstract

The WRKY transcription factors modulate numerous physiological processes, including plant growth, development and responses to various environmental stresses. Currently, our understanding of the functions of the majority of the WRKY family members and their possible roles in signalling crosstalk is limited. In particular, very few WRKYs have been identified and characterised from an economically important crop, cotton. In this study, we characterised a novel group IIc WRKY gene, *GhWRKY68*, which is induced by different abiotic stresses and multiple defence-related signalling molecules. The  $\beta$ -glucuronidase activity driven by the *GhWRKY68* promoter was enhanced after exposure to drought, salt, abscisic acid (ABA) and H<sub>2</sub>O<sub>2</sub>. The overexpression of *GhWRKY68* in *Nicotiana benthamiana* reduced resistance to drought and salt and affected several physiological indices. *GhWRKY68* may mediate salt and drought responses by modulating ABA content and enhancing the transcript levels of ABA-responsive genes. *GhWRKY68*-overexpressing plants exhibited reduced tolerance to oxidative stress after drought and salt stress treatments, which correlated with the accumulation of reactive oxygen species (ROS), reduced enzyme activities, elevated malondialdehyde (MDA) content and altered ROS-related gene expression. These results indicate that *GhWRKY68* is a transcription factor that responds to drought and salt stresses by regulating ABA signalling and modulating cellular ROS.

## Introduction

In the natural environment, plants often simultaneously confront a great variety of abiotic and biotic stresses. To cope with these stresses, they have evolved sophisticated defence mechanisms. Transcriptional modulation is vital for the complex genetic and biochemical networks to respond to stress. A number of transcription factors (TFs) have been shown to participate in regulating defence responses [1, 2].

WRKY TFs are the most important TFs in plants, and they contain one or two highly conserved WRKYGQK sequences at the N-terminus and a zinc finger motif at the C-terminus [3]. Based on the number of WRKY domains and the primary structure of the zinc-finger motif,

WRKY members can be subdivided into three major groups (I–III), and group II can be further split into five subgroups (IIa–e) [4]. It is generally assumed that WRKY TFs act as major regulatory proteins by specifically binding to the W-box [TTGAC(C/T)] to regulate gene expression [2, 3, 5].

There is an increasing amount of evidence that WRKY TFs are key regulators in the complex signalling and transcriptional networks of plant defences [6–9]. Previous studies have examined the roles of plant WRKY proteins in response to biotic stress. For example, *BnWRKY33* plays an important role in *B. napus* defence against *S. sclerotiorum*, which is associated with the activation of the salicylic acid (SA)- and jasmonic acid (JA)-mediated defence responses [10]. *CaWRKY40* is regulated by SA, JA and ethylene (ET) signalling, and it plays an important role in the regulation of tolerance to heat stress and resistance to *Ralstonia solanacearum* infection [11]. Over the last several years, an increased amount of evidence has shown that WRKY proteins are also involved in modulating abiotic stress tolerance [12–15]. In *Arabidopsis*, *WRKY25*, *WRKY26* and *WRKY33* play important roles in the response to heat stress [16]. Constitutive expression of *WRKY57* can improve drought tolerance [14]. Transgenic *Arabidopsis* overexpressing *TaWRKY2* or *TaWRKY19* displayed improved salt and drought tolerance [17]. Three soybean WRKY-type transcription factor genes conferred differential tolerance to abiotic stresses in transgenic *Arabidopsis* plants. For example, *GmWRKY21* transgenic plants were tolerant to cold stress, whereas *GmWRKY54* conferred salt and drought tolerance. Transgenic plants overexpressing *GmWRKY13* exhibited sensitivity to salt and mannitol stress [18]. ABO3/WRKY63 mediates responses to abscisic acid (ABA) and drought tolerance in *Arabidopsis* [19]. The alleles OsWRKY45-1 and OsWRKY45-2 play different roles in ABA signalling and cold, salt and drought stresses adaptation in rice [20]. Recently, Yan reported that GhWRKY17 responds to drought and salt stress through ABA signalling and the control of cellular ROS production in cotton [21]. Although evidence that WRKY proteins are involved in abiotic stress is increasing, the understanding of the roles of these proteins in the responses to abiotic stress is progressing relatively slowly [17], and the challenge to elucidate the molecular mechanisms of defence remains. Moreover, there is little information about WRKY genes in non-model plants.

Abscisic acid (ABA), an important phytohormone, is a key signal for regulating a range of plant physiological processes in response to various biotic and abiotic stresses. Osmotic stresses, including drought and high salinity, can trigger the ABA-dependent signalling pathway and ABA accumulation [22, 23]. An increased level of ABA activates downstream transcription factors and modulates the expression of various ABA-responsive genes [24, 25]. ABA also promotes cellular reactive oxygen species (ROS) production in *Arabidopsis* guard cells [26], and Zhang [27] reported that ROS positively regulates the ABA inhibition of stomatal opening. Extensive research has demonstrated that ROS are important signal transduction molecules, modulating plant development, growth, hormonal signalling, and defence [28, 29]. High ROS concentrations contribute to ROS-associated injury [30], and the regulation of ROS levels is crucial for abiotic stress tolerance in plants [31]. It is important to examine the roles of WRKY TFs in cross-network signalling between ROS and ABA in the response to drought and salt stress.

Cotton is an important source of natural fibre used in the textile industry, and it is particularly susceptible to waterlogging stress [32]. *Gossypium hirsutum* L. represents more than 95% of the cotton cultivated worldwide [33]. In cotton, only a small number of WRKY TFs have been isolated and characterised. Therefore, understanding the underlying roles of WRKY proteins in the tolerance of osmotic stress is an important global problem for breeding programs. In the present study, a group IIc WRKY gene, *GhWRKY68*, was isolated from cotton (*G. hirsutum* L.). The gene can be induced by abiotic stresses and multiple defence-related signalling

molecules. Many abiotic stress-responsive elements were observed in the promoter region of this gene, and  $\beta$ -glucuronidase activity driven by the promoter was enhanced by treatments with drought, salt, ABA and H<sub>2</sub>O<sub>2</sub>. The overexpression of *GhWRKY68* in *Nicotiana benthamiana* significantly reduced resistance to drought and salt modulated by ABA signalling and the regulation of ROS. Hence, this study was conducted with the aim of understanding the mechanism by which the WRKY TFs regulate plant responses to drought and salt stress.

## Results

### Identification and sequence analysis of *GhWRKY68*

Based on the conserved region of plant stress-related WRKY genes, a pair of degenerate primers, WP1 and WP2, was designed, and a putative WRKY fragment was isolated. Next, the rapid amplification of cDNA ends by PCR (RACE-PCR) was used to amplify the 5' untranslated region (UTR) and the 3' UTR. Finally, the deduced full-length cDNA sequence consisting of 1118 bp was retrieved. Because *AtWRKY68* is the *Arabidopsis* WRKY gene most closely related to this putative cotton WRKY gene, we designated this new WRKY gene as *GhWRKY68* (GenBank, KJ551845). The gene encoded a protein with a predicted relative molecular mass of 33.186 kDa and a theoretical isoelectric point of 8.71. Multi-alignment analysis revealed that the deduced WRKY protein was closely related to other plant WRKY proteins, sharing 57.14, 57.01, 51.90 and 57.32% homology with PtWRKY48 (XP\_002301524), PtWRKY23 (ABK41486.1), VvWRKY48 (XP\_002279385), and PtWRKY13 (ACV92015), respectively. Similar to the other WRKY TFs, *GhWRKY68* has one WRKY domain that contains the highly conserved amino acid sequence WRKYGQK and a single putative zinc finger motif (C-X<sub>4-5</sub>-C-X<sub>22-23</sub>-H-X<sub>1</sub>-H) (Fig. 1A). Phylogenetic analysis further revealed the evolutionary relationship to other WRKYs from various plant species, suggesting that *GhWRKY68* belongs to Group IIc of the WRKY family (Fig. 1B). In addition, with a pair of specific primers, WQC1 and WQC2, the *GhWRKY68* genomic sequence (KJ551846) was amplified. The sequence consisted of 2543 bp interrupted by two introns of 228 and 138 bp. Currently, there is no other study on *GhWRKY68* from cotton; therefore, we characterised this gene.

### Characterisation of *GhWRKY68* as a transcription factor

Using the Nuc-PLoc program and the CELLO version 2 program, we predicted that *GhWRKY68* was localised in the nucleus. To test this prediction, 35S::GhWRKY68-GFP and 35S::GFP plasmids were constructed, and the latter was used as the control (Fig. 2A). Then, the 35S::GhWRKY68-GFP and 35S::GFP plasmids were introduced into onion epidermal cells. The fluorescence was observed by confocal microscopy. The nuclei were stained with DAPI. As shown in Fig. 2B, onion epidermal cells carrying the 35S::GhWRKY68-GFP plasmid emitted fluorescence only in the nuclei, whereas the 35S::GFP control exhibited GFP signals in both the cytoplasm and the nuclei. These results demonstrated that the *GhWRKY68* protein was localised in the nucleus.

Numerous studies have demonstrated that WRKY TFs modulate protein expression by binding to the W-box [TTGAC(C/T)], which is present in the promoters of defence-associated genes as well as in many WRKY genes [3]. To test whether this binding also applies to *GhWRKY68*, a yeast one-hybrid experiment was performed. Three tandem repeats of the W-box (TTGACC) or the mW-box (TAGACG) (Fig. 2C) were inserted into the pAbAi vector and integrated into the genome of yeast strain Y1H gold with an Aureobasidin A resistance (AbA<sup>r</sup>) reporter gene (*AUR-1C*). A yeast effector vector, pGADT7-WRKY68, and an empty vector, pGADT7, were transformed into the yeast strain Y1H Gold carrying a pAbAi-W-box or a pAbAi-mW-box plasmid. All of the transformed yeast cells grew on leucine (Leu)-

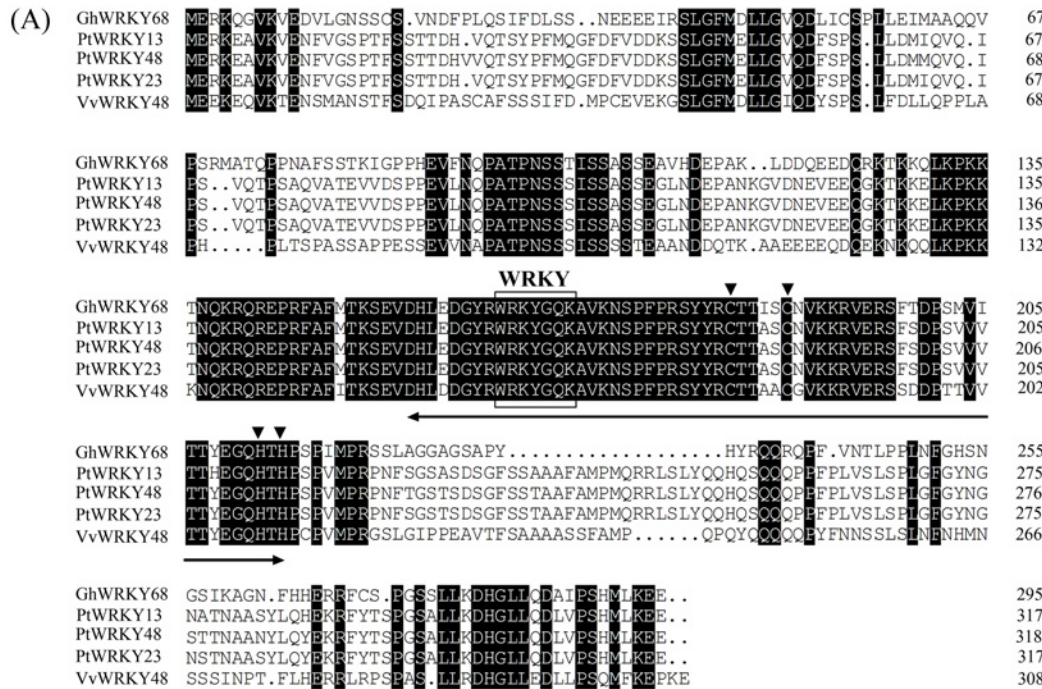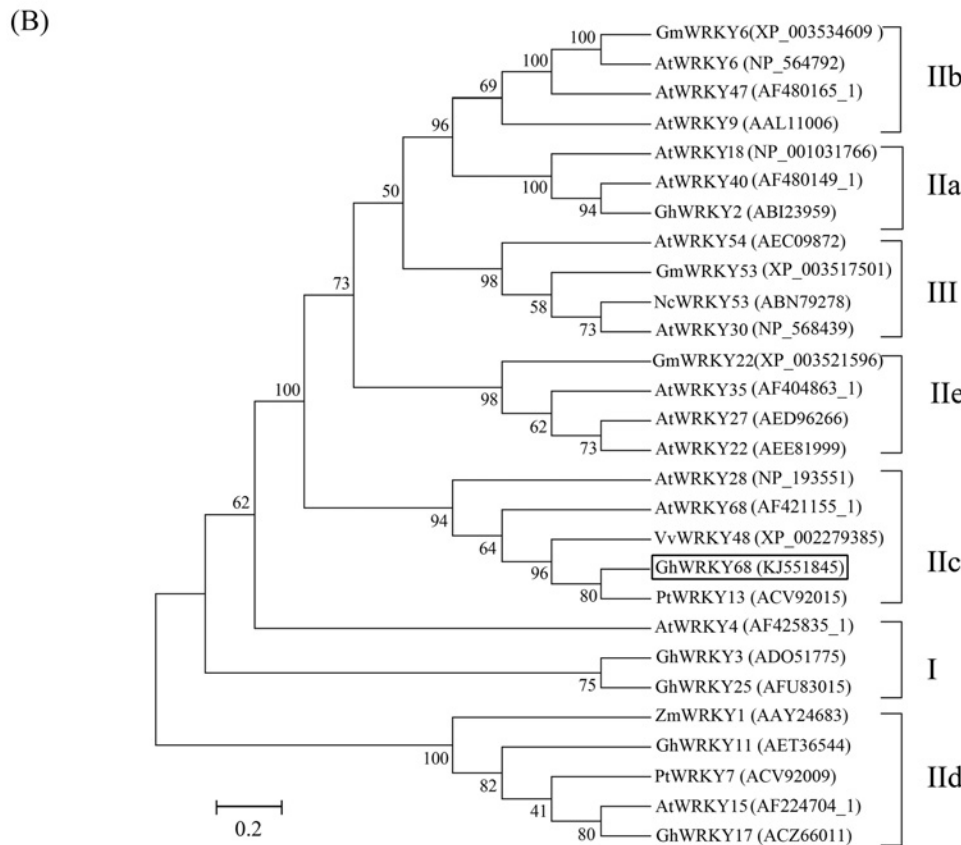

**Fig 1. Sequence and phylogenetic analyses of GhWRKY68.** (A) Sequence alignment of the deduced GhWRKY68 protein with *PtWRKY48*, *PtWRKY23*, *VvWRKY48*, and *PtWRKY13*. Identical amino acids are shaded black. The approximately 60-amino acid WRKY domain is marked by the two-headed arrow. The C and H residues in the zinc-finger motif (C-X4-5-C-X22-23-H-X1-H) are marked by triangles. The highly conserved amino acid sequence WRKYGQK in the WRKY domain is boxed. (B) Phylogenetic analysis of WRKY proteins from different species. The amino acid sequences were subjected to Clustal W

using the neighbour-joining method in MEGA 4.1. GhWRKY68 is highlighted in the box. The gene name is followed by the protein ID. The species of origin of the WRKYs are indicated by the abbreviations before the gene names: At *Arabidopsis thaliana*, Gh *Gossypium hirsutum*, Pt *Populus tomentosa*, Vv *Vitis vinifera*, Zm *Zea mays*, Gm *Glycine max* and Nc *Noccaea caerulea*.

doi:10.1371/journal.pone.0120646.g001

and uracile (Ura<sub>-</sub>-deficient synthetic dextrose (SD) medium (SD/-Leu/-Ura), confirming the success of the transformation (Fig. 2D). Only the yeast clones harbouring the pAbAi-W-box and pGAD-GhWRKY68 grew on SD/-Leu containing 500 ng/ml AbA (Fig. 2D). These results demonstrated that GhWRKY68 bound to the W-box element and functioned as a transcriptional activator in this yeast system.

To test whether GhWRKY68 activates gene expression by interacting with the W-box in plant cells, we performed transient co-expression experiments. The reporter vector W-box-35S mini-GUS (Fig. 2E) was either transformed alone or with the effector plasmid 35S::GhWRKY68 (Fig. 2E) into *N. benthamiana* leaves using *Agrobacterium*-mediated transient expression followed by a GUS histochemical staining assay. The tobacco leaves co-transformed with W-box-35S mini-GUS and 35S::GhWRKY68 were stained dark blue. In contrast, leaves transformed with only the effector never stained blue, and leaves transformed with only the reporter vector showed a slight blue background (Fig. 2F). Thus, overexpression of GhWRKY68 can activate the expression of GUS in *N. benthamiana* leaves in a W-box-dependent manner.

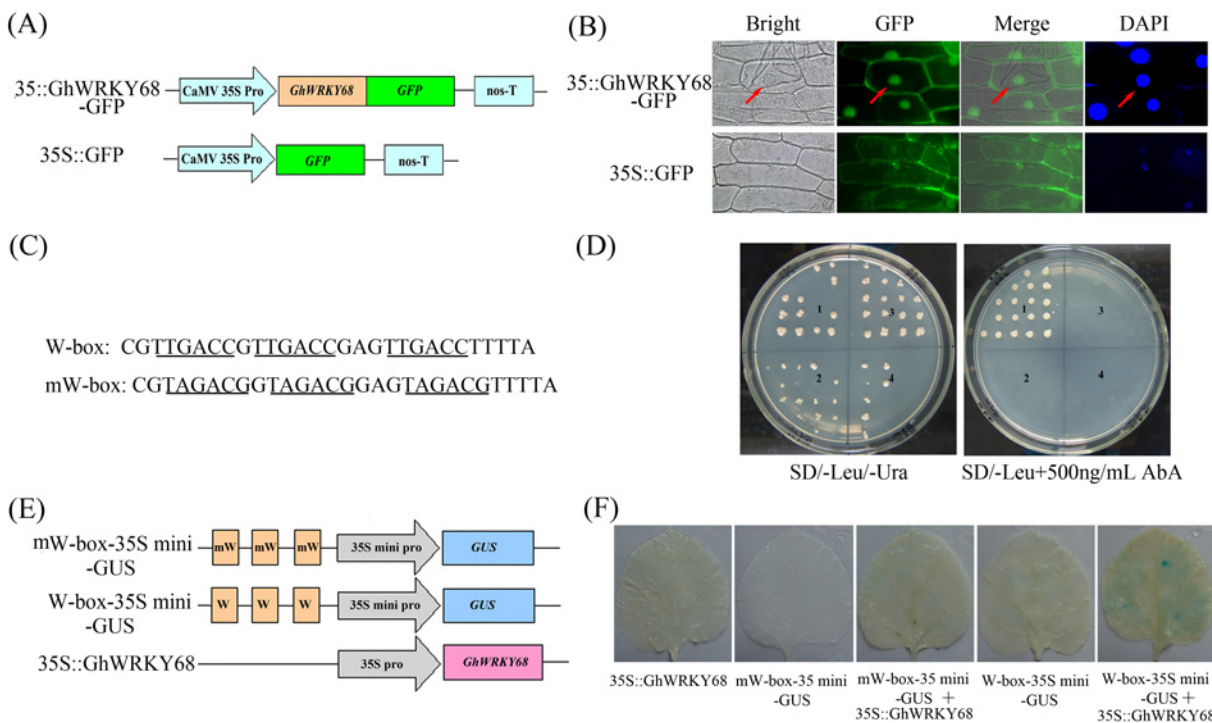

**Fig 2. Characterisation of GhWRKY68 as a transcription factor.** (A) Schematic diagram of the 35S-GhWRKY68::GFP fusion protein construct and the control 35S-GFP construct. GFP was fused in frame to the C terminus of GhWRKY68. (B) Transient expression of the 35S-GhWRKY68::GFP and 35S-GFP constructs in onion epidermal cells 24 h after particle bombardment. Green fluorescence was observed using a fluorescence microscope, and the nuclei of the onion cells were visualised by DAPI staining. (C) Sequence of the triple tandem repeats of the W-box and mW-box. (D) Transactivation analysis of GhWRKY68 with the yeast one-hybrid assay using the 3xW-box or mW-box as bait. Yeast cells carrying pGAD-GhWRKY68 or pGAD7 were grown on SD/-Leu/-Ura or SD/-Leu containing 500 ng/ml AbA. 1, pAbAi-W-box/pGAD-GhWRKY68, 2, pAbAi-W-box/pGAD7, 3, pAbAi-mW-box/pGAD-GhWRKY68, and 4 pAbAi-mW-box/pGAD7. (E) Schematic diagram of the reporter and effector constructs used for co-transfection. (F) Histochemical analysis of co-transformed *N. benthamiana* leaves. Fully expanded leaves from 8-week-old *N. benthamiana* were agro-infiltrated with the indicated reporter and effector at an OD<sub>600</sub> of 0.6. GUS staining was performed 3 days after the transformation.

doi:10.1371/journal.pone.0120646.g002

## GhWRKY68 promoter analysis

To clarify the mechanism underlying the *GhWRKY68* expression patterns in response to multiple stresses, the 1118 bp promoter region of *GhWRKY68* (KJ551846) was isolated using inverse PCR (I-PCR) and nested PCR [34]. Many response elements for abiotic and biotic stress, tissue-specific expression, development and light were predicted by the database search programs PLACE and Plant-CARE (Table 1). Among these elements was MBS, a MYB binding site involved in drought tolerance in *Arabidopsis* [35]. An AREB cis-acting element was predominant in ABA-dependent gene expression [36]. These results suggest that *GhWRKY68* may play a role in the response to environmental stresses and in developmental pathways.

To test the activity of the *GhWRKY68* promoter, four independent transgenic *Arabidopsis* T<sub>3</sub> lines harbouring the Pro*GhWRKY68*::GUS construct were used for GUS histochemical staining assays. As shown in Fig. 3A, GUS staining was mainly detected in the germination stage, and weak GUS staining was observed at the reproductive stage. The tissue-specific regulation of the *GhWRKY68* promoter, assessed by GUS expression, was confined to the root, leaf and shoot apical meristem (SAM) of 2-week-old transgenic seedlings (Fig. 3B (a-c)) and to the flower and pod at the reproductive stage (Fig. 3B (d-e)). These results indicate that *GhWRKY68* might be involved in developmental regulation. In addition, GUS expression was induced by various treatments. Slight GUS staining was observed in the absence of stress (Fig. 3C (a)). However, GUS expression was strongly induced in the SAM, root and leaf after NaCl, PEG, ABA or H<sub>2</sub>O<sub>2</sub> treatments (Fig. 3C (b-e)). Taken together, these results suggest that *GhWRKY68* is a stress-inducible gene, and its expression is regulated spatially and temporally.

## The transcriptional levels of *GhWRKY68* are influenced by various stresses

Transcriptional modulation is a vital aspect of the complex signal transduction pathway that enables plants to respond to biotic and abiotic stresses [1, 3]. To study the expression patterns of *GhWRKY68* under diverse environmental stresses, transcript levels of this gene were measured after the cotton seedlings had been exposed to drought (PEG6000) and salt (NaCl). The expression profile of *GhWRKY68* in plants that were not exposed to treatment was used as control, and no changes in *GhWRKY68* transcript levels were noted during the 0- to 8-h series (Fig. 4A). As shown in Fig. 4B, treatment with NaCl strongly induced the transcription of *GhWRKY68* a 3.8-fold induction was observed at 4 hours post-treatment (hpt). The PEG6000 treatment also induced the expression of *GhWRKY68*, but the induced levels were lower than after NaCl treatment (Fig. 4C).

ABA and H<sub>2</sub>O<sub>2</sub> are important signalling molecules that play crucial roles in the mediation of the expression of downstream genes in plant defence reactions against biotic and abiotic stresses [37]. To characterise the function of *GhWRKY68* in plant defences, we examined the expression pattern of *GhWRKY68* in cotton treated with various phytohormones using qPCR. In response to ABA, the *GhWRKY68* transcript levels increased within 1 hpt to 4 hpt, reaching maximal levels at 4 hpt (4.1-fold relative to mock-treated, Fig. 4D). The *GhWRKY68* transcript level was enhanced by H<sub>2</sub>O<sub>2</sub>: a 3.7-fold induction was observed at 2 hpt (Fig. 3E). These results indicate that *GhWRKY68* expression was induced under various stress conditions.

## Overexpression of *GhWRKY68* enhances the drought sensitivity of transgenic plants

The promoter analysis and differential expression patterns analysis suggested that *GhWRKY68* may play a role in multiple stress defence responses, especially in the osmotic stress response.

**Table 1. Putative cis-acting elements of the promoter of GhWRKY68.**

| Cis-element                                             | Position         | Sequence (5'-3')   | function                                                              |
|---------------------------------------------------------|------------------|--------------------|-----------------------------------------------------------------------|
| <i>Abiotic stress responsive element</i>                |                  |                    |                                                                       |
| ABRE                                                    | -90 (+)          | CACGTG             | cis-acting element involved in the abscisic acid responsiveness       |
| HSE                                                     | -555 (+)         | AAAAAATTTTC        | cis-acting element involved in heat stress responsiveness             |
| TCA-element                                             | -1056 (-)        | CAGAAAAGGA         | cis-acting element involved in salicylic acid responsiveness          |
| GARE-motif                                              | -150 (+)         | AAACAGA            | gibberellin-responsive element                                        |
| LTR                                                     | -575 (+)         | CCGAAA             | cis-acting element involved in low-temperature responsiveness         |
| MBS                                                     | -961(-)          | CAACTG             | MYB binding site involved in drought-inducibility                     |
| ARE                                                     | -733 (+)         | TGGTTT             | cis-acting regulatory element essential for the anaerobic induction   |
| TC-rich repeats                                         | -497 (-)         | ATTTTCTTCA         | cis-acting element involved in defense and stress responsiveness      |
| <i>Pathogen/elicitor-related elements</i>               |                  |                    |                                                                       |
| Box-W1                                                  | -910 (+)         | TTGACC             | fungal elicitor responsive element                                    |
| <i>Light responsive elements</i>                        |                  |                    |                                                                       |
| GA-motif                                                | -287 (-)-995 (-) | AAAGATGAAAGGAAGA   | part of a light responsive element                                    |
| GAG- motif                                              | -942 (-)-991(-)  | AGAGAGT            | part of a light responsive element                                    |
| GATA-motif                                              | -378 (-)         | AAGATAAGATT        | part of a light responsive element                                    |
| I-box                                                   | -378 (-)-380 (-) | GATAAGATAAAGATAAGA | part of a light responsive element                                    |
| TCCC—motif                                              | -950 (+)         | TCTCCCT            | part of a light responsive element                                    |
| Sp1                                                     | -797(-)          | GGGCGG             | light responsive element                                              |
| TCT-motif                                               | -744(-)          | TCTTAC             | part of a light responsive element                                    |
| <i>Tissue-specific and development-related elements</i> |                  |                    |                                                                       |
| CCGTCC-box                                              | -306(-)          | CCGTCC             | cis-acting regulatory element related to meristem specific activation |
| Skn-1_motif                                             | -874(-)          | GTCAT              | cis-acting regulatory element required for endosperm expression       |
| circadian                                               | -279(+)          | CAANNNNATC         | cis-acting regulatory element involved in circadian control           |

doi:10.1371/journal.pone.0120646.t001

Further functional analyses of *GhWRKY68* were performed through ectopic expression in *N. benthamiana* because the transformation of cotton plants is difficult and time consuming. Six independent transgenic *N. benthamiana* lines overexpressing (OE) *GhWRKY68* were obtained by kanamycin resistance selection and confirmed by PCR (S1 Fig. A), and the efficiency of tobacco transformation was 54.5%. RT-PCR and qPCR analyses were performed to detect the expression levels of the transgene in different lines (S1 Fig. B-C). Three representative T<sub>2</sub> lines, OE1 (7#), OE2 (8#), and OE3 (10#), showing similar expression levels of *GhWRKY68*, were chosen for further experiments. No phenotypic differences were observed between the *GhWRKY68*-OE transgenic lines and wild-type (WT) plants at any time during the life cycle.

To determine the influence of drought on the transgenic lines, the germination capacity of WT and OE plants was evaluated on 1/2 Murashige & Skoog (MS) medium supplemented with exogenous mannitol (0, 100 and 200 mM) to mimic drought conditions. As shown in Fig. 5A-B, there were no significant differences in the growth or germination rates of the WT and OE plants during germination under normal conditions. However, following treatment with mannitol, the germination of both the WT and OE lines was inhibited as a function of increasing mannitol concentration. In addition, transgenic seeds were more strongly suppressed than wild-type seeds, resulting in the germination of the OE plants being approximately 10–15% of that of WT plants in the presence of 200 mM mannitol 3 days after sowing (Fig. 5A-B).

To further assess the effect of *GhWRKY68* overexpression on drought tolerance at the vegetative growth stage, 8-week-old WT and OE plants were grown in the same pot without water for 10 days. After 10 days of drought treatment, OE plants showed more leaf wilting than WT

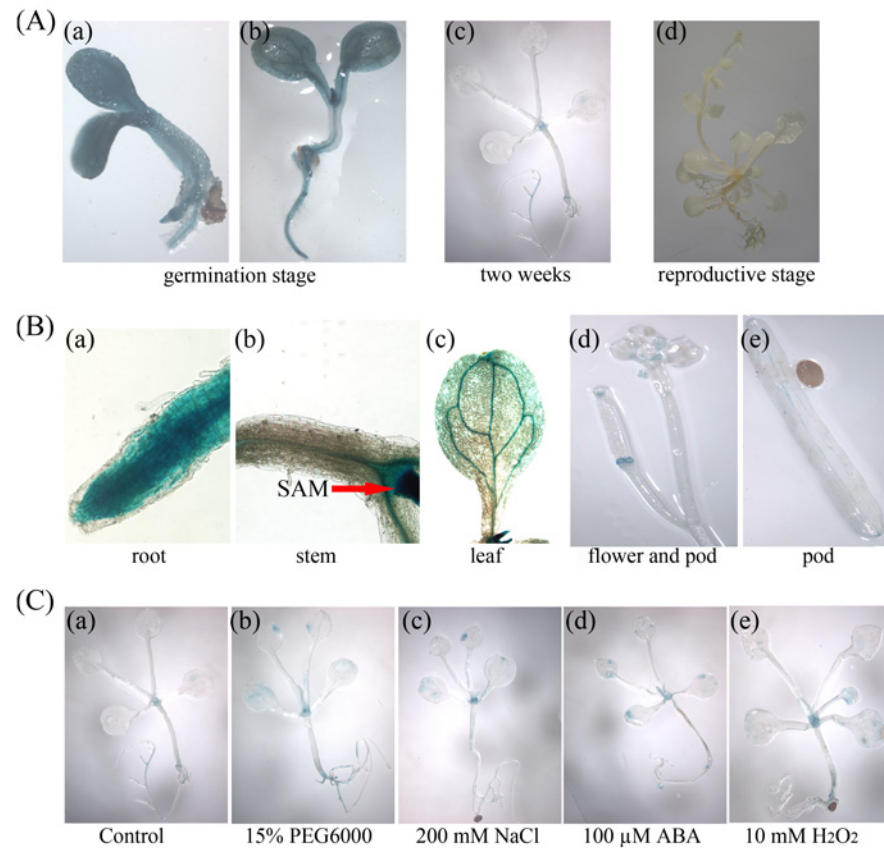

**Fig 3. Histochemical analyses of GUS activity in ProGhWRKY68::GUS transgenic *Arabidopsis*.** (A) ProGhWRKY68::GUS activity during different developmental stages. (B) Activity of the ProGhWRKY68::GUS construct in different tissue regions. (C) Histochemical assays of GUS activity in response to various stresses.

doi:10.1371/journal.pone.0120646.g003

plants (Fig. 5C). When they were re-watered, the survival of the transgenic plants was approximately 30–43% lower than that of the WT plants (Fig. 5D). Additionally, the rate of water loss from the detached leaves of the OE plants was lower than that of WT plants under dehydration conditions (Fig. 5E-F). Stomatal closure is a major plant mechanism for reducing water loss during drought [38]. Thus, the stomatal state was observed by microscopy under drought conditions. Under normal conditions, there was no significant difference between the stomatal length:width ratios of the opened stomata of the WT and OE plants. However, the stomatal apertures in the OE lines were more open than those of the WT plants after drought stress. After a 2-day watering recovery, the stomata reopened, and the OE lines showed a higher length:width ratio than the WT plants (Fig. 5G-H). All our data indicate that the overexpression of *GhWRKY68* can enhance drought sensitivity in transgenic tobacco plants at both the seedling and the vegetative growth stages.

### The overexpression of *GhWRKY68* decreased tolerance to salt stress in transgenic plants

To investigate the possible effects on salt tolerance of the constitutive expression of *GhWRKY68* in transgenic plants, both WT and OE plants were challenged with salt stress during the germination and vegetative stages. Seeds of WT and OE plants were germinated on 1/2



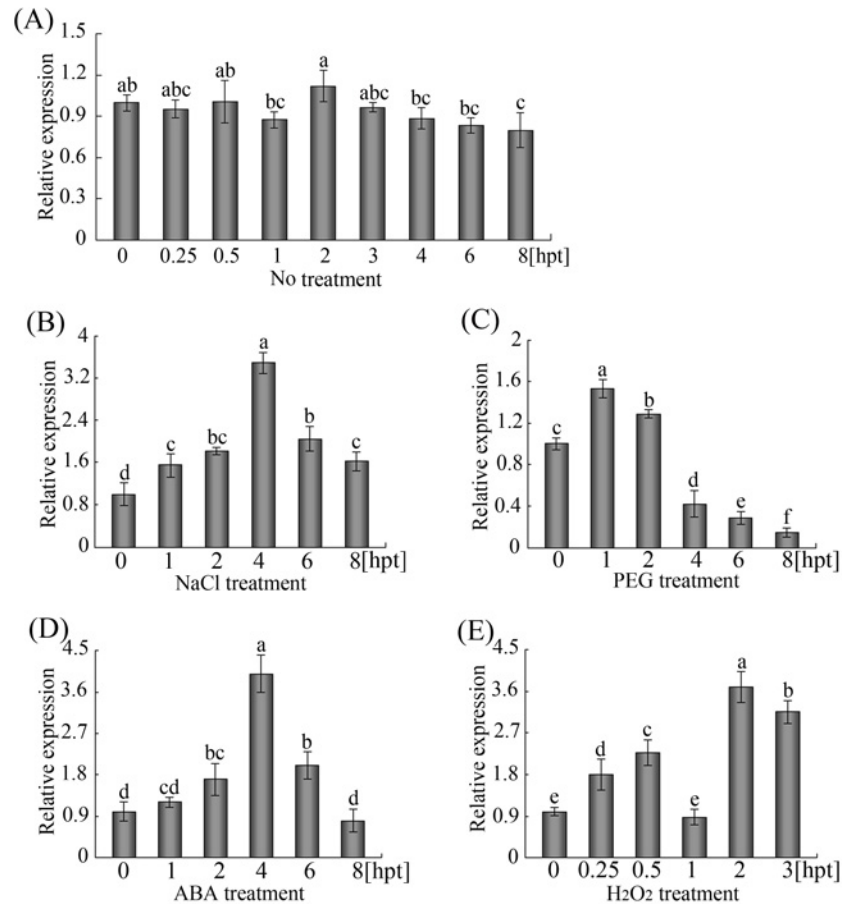

**Fig 4. Expression profiles of *GhWRKY68* in cotton leaves under various stresses.** Total RNA from cotyledons of 7-day-old cotton seedlings exposed to (A) no treatment (B) 200 mM NaCl, (C) 15% PEG6000, (D) 100  $\mu$ M ABA, and (E) 10 mM H<sub>2</sub>O<sub>2</sub> were obtained for qPCR. The lanes represent various times during the treatments. The expression profile of cotyledons that did not receive treatment was used as control. *GhUBQ* was included as an internal control, and the experiment was repeated at least twice.

doi:10.1371/journal.pone.0120646.g004

MS agar medium containing different NaCl concentrations (0, 100, or 200 mM). As illustrated in Fig. 6A-B, the presence of salt significantly affected the germination rates of OE seeds. To verify whether *GhWRKY68* decreased the salt tolerance of the transgenic plants in the vegetative stage, WT and OE plants were irrigated with salt water (200 mM) for 1 month. The OE plants showed severe growth retardation (Fig. 6C) and serious leaf curling and chlorosis (Fig. 6E) compared with WT plants after NaCl treatment. Approximately 40% of the OE plants survived the high-salinity conditions, a survival rate lower than that of WT plants (Fig. 7D). Furthermore, the total chlorophyll content of the OE plants was significantly less than that of the WT plants. Taken together, these results indicated that the overexpression of *GhWRKY68* might confer reduced tolerance to salt stress in transgenic plants during seed germination and in the vegetative stage.

### *GhWRKY68* overexpression negatively regulates ABA signalling in transgenic plants

ABA is an important phytohormone regulating plant development and various stress responses, including osmotic stress responses [39]. The expression of *GhWRKY68* increased

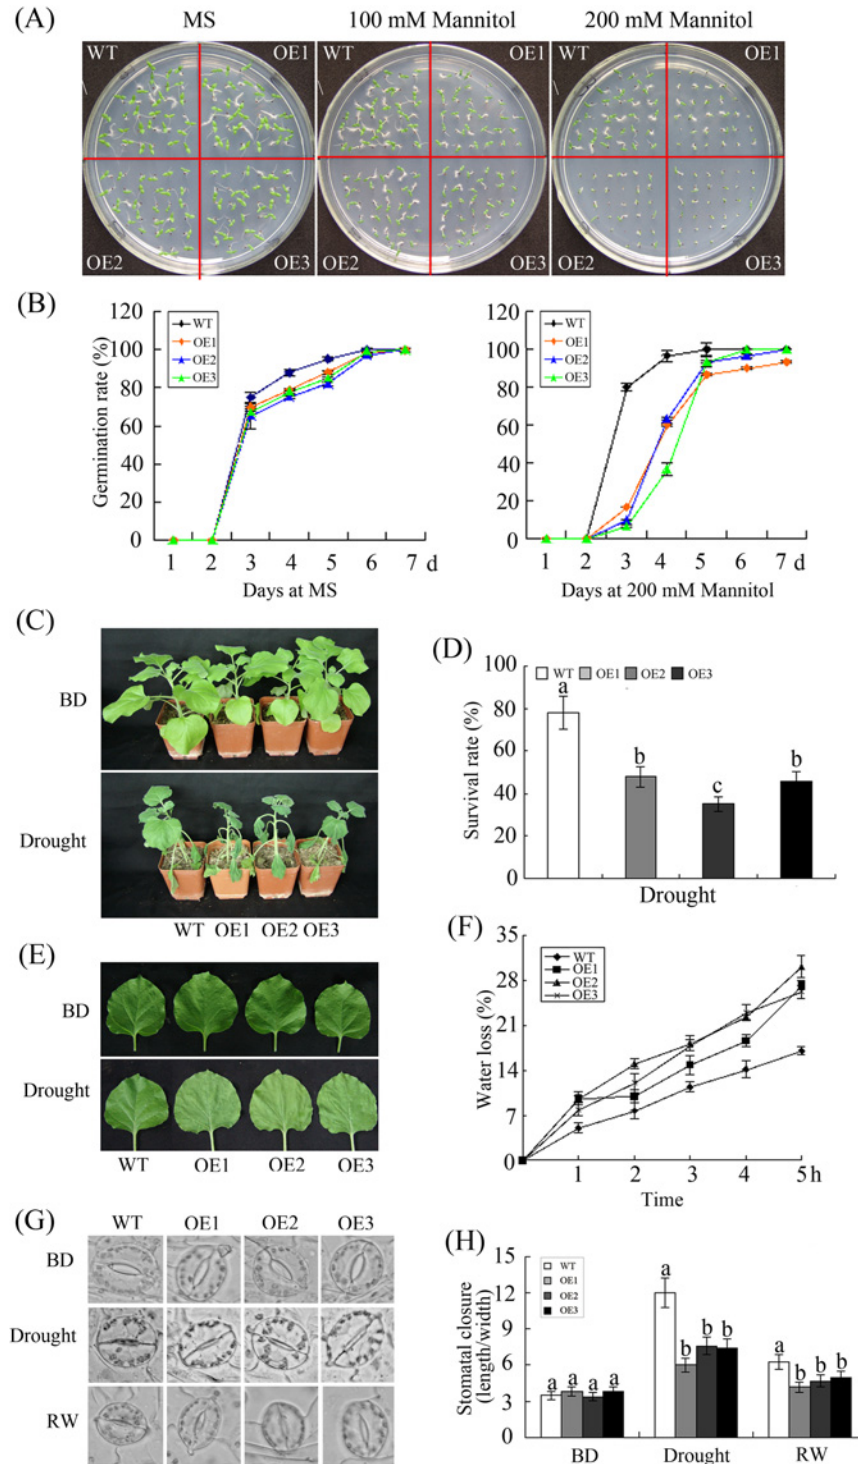

**Fig 5. Enhanced drought sensitivity of transgenic *N. benthamiana* overexpressing *GhWRKY68*.** (A) Seed germination on 1/2 MS medium with 0, 100, or 200 mM mannitol. (B) The germination rates of the WT and OE lines in 0 or 200 mM mannitol treatment conditions are presented. Germination was scored daily. (C) Representative phenotypes of 8-week-old WT and OE plants grown in soil before or after 10 days of drought. (D) Survival rates of WT and OE plants under drought conditions. (E) Representative phenotypes of the detached leaves of WT and OE plants under dehydration conditions. (F) Relative water loss rates from detached leaves of WT and OE plants were measured after dehydration at the indicated times. (G-H)

Stomatal changes observed with a microscope before and after drought treatment. The stomatal length: width ratio is displayed. BD, before drought treatment; RW, re-watering. The data presented are the means  $\pm$  SE of three independent experiments ( $n = 3$ ). Different letters above the columns in (D) and (H) indicate significant differences ( $P < 0.0001$ ) according to Duncan's multiple range test performed using SAS version 9.1 software.

doi:10.1371/journal.pone.0120646.g005

significantly in response to ABA, indicating that *GhWRKY68* is involved in ABA signalling. Thus, the sensitivity of WT and OE plants exposed to ABA was explored. As shown in [Fig. 7A-B](#), OE seeds showed lower germination rates than WT seeds in medium supplemented with various ABA concentrations. The responses to ABA during the post-germination growth stage were also assessed. The seeds of WT and OE plants were germinated on 1/2 MS medium for 2 days and were then transferred to medium supplemented with different ABA concentrations (0, 2 or 5  $\mu$ M). In the absence of exogenously applied ABA, there was no significant difference in the root growth of WT and OE plants. However, in the OE plants, root growth was significantly inhibited, and the taproot length in the OE plants was less than that in the WT plants upon treatment with different concentrations of ABA ([Fig. 7C-D](#)). ABA-mediated stomatal closure plays a key role in osmotic regulation. Thus, the stomata were analysed to investigate whether the overexpression of *GhWRKY68* affected the sensitivity of guard cells to ABA treatment. Without ABA treatment, no difference in the stomatal length:width ratio was observed between WT and OE plants. However, the OE plants showed a lower ratio than the WT plants after 20  $\mu$ M ABA treatment ([Fig. 7E-F](#)). Drought and salt stresses can trigger ABA-dependent signalling pathways [40]. The OE plants contained lower levels of ABA than the WT plants before and after drought and salt treatment ([Fig. 7G](#)).

To elucidate the possible mechanisms of *GhWRKY68*-mediated drought and salt sensitivity involving the ABA signalling pathway, we examined the expression of some ABA-responsive genes in the transgenic plants during drought and salt treatments. These genes included *NbAREB* (ABA-responsive element binding), *NbDREB* (dehydration-responsive element binding), *Nbosmotin*, and *NbNCED* (nine-cis-epoxycarotenoid dioxygenase), *NbERD* (early responsive to dehydration), *NbLEA* (late-embryogenesis-abundant protein), and *NbSnRK2.3* (SNF1-related protein kinase 2.3), which are stress-inducible marker genes that function in ABA-dependent and ABA-independent pathways [37, 41–44]. Under drought and salt stress, the expression levels of *NbDREB*, *Nbosmotin*, *NbNCED*, *NbERD*, *NbSnRK2.3* and *NbLEA* in the transgenic plants were reduced compared with their levels in WT plants ([Fig. 8B-G](#)); however, *NbAREB* transcript levels were increased in OE plants compared with WT plants ([Fig. 8A](#)).

### *GhWRKY68* mediates the accumulation of ROS and enhanced oxidative damage in transgenic plants

ROS act as important signal transduction molecules, mediating tolerance to various stresses, mainly  $O_2^-$  and  $H_2O_2$  [45]. Drought and salinity impose osmotic stress, which induces ROS production and causes ROS-associated injury [30, 46]. To investigate the tolerance to oxidative stress in the transgenic plants, the accumulation of  $O_2^-$  and  $H_2O_2$  in detached leaves from the WT and OE plants was measured using DAB staining. Untreated WT and OE plants were used as controls. As shown in [Fig. 9A](#), no obvious  $O_2^-$  or  $H_2O_2$  accumulated in WT or OE plants under normal conditions. However, after treatment with drought and salt, the leaves of the OE lines accumulated higher levels of  $O_2^-$  and  $H_2O_2$  compared with WT leaves. Furthermore,

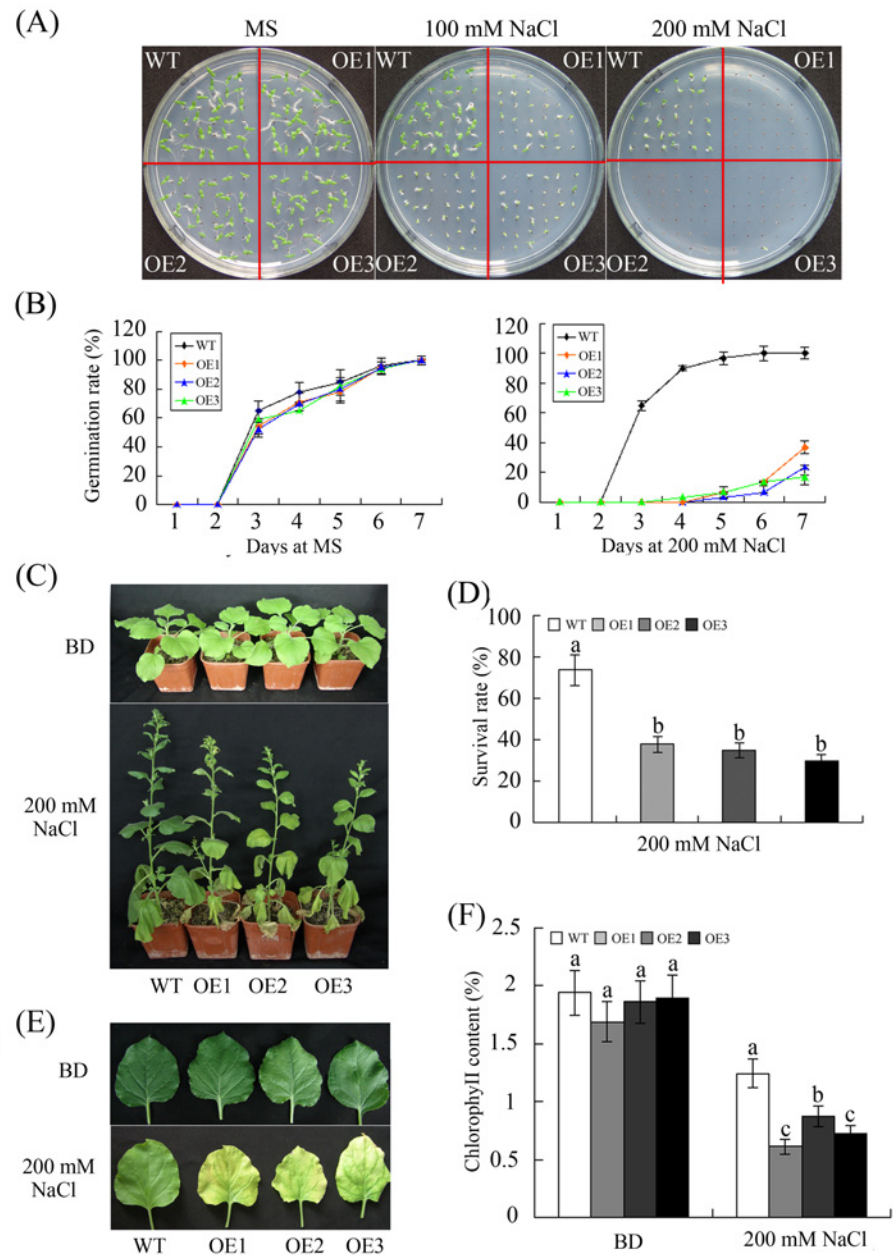

**Fig 6. Reduced salt tolerance in transgenic plants overexpressing *GhWRKY68*.** (A) Seed germination on 1/2 MS medium containing different concentrations of NaCl. (B) Germination rates of the WT and OE lines under 0 or 200 mM NaCl treatment conditions. Germination was scored daily. (C) Representative phenotypes of 8-week-old WT and OE plants grown in soil before and after 200 mM NaCl treatment for 1 month. (D) Survival rates of WT and OE plants after 200 mM NaCl treatment. (E) Representative phenotypes of the detached leaves of WT and OE plants treated with 200 mM NaCl. (F) Quantification of chlorophyll content. The values represent the chlorophyll content in the salt-treated plants relative to that of the untreated plants. BD, before drought treatment. The data presented are the means  $\pm$  SE of three independent experiments ( $n = 3$ ). Different letters above the columns in (D) and (F) indicate significant differences ( $P < 0.05$ ) according to Duncan's multiple range test performed using SAS version 9.1 software.

doi:10.1371/journal.pone.0120646.g006

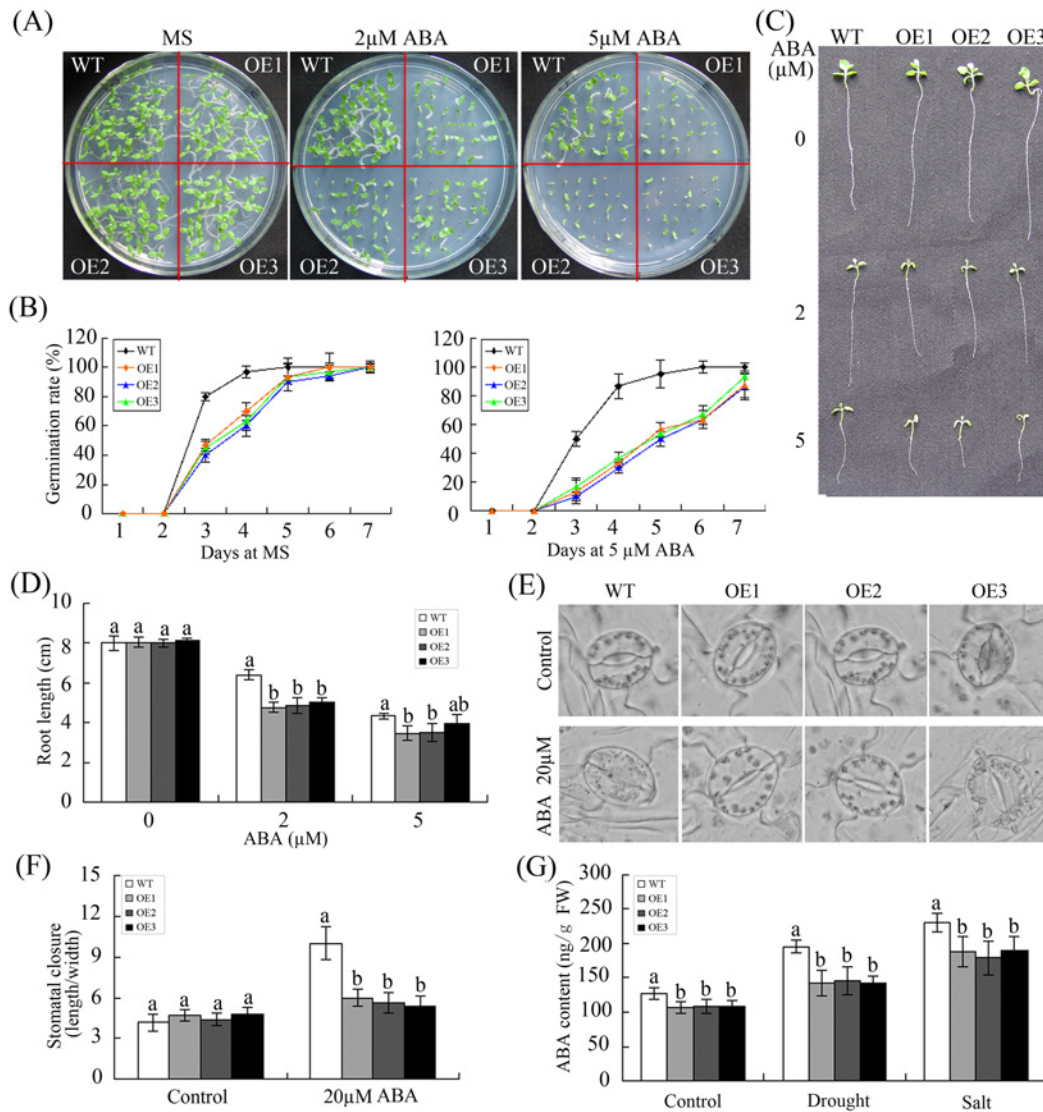

**Fig 7. Overexpression of *GhWRKY68* negatively regulates ABA signalling in transgenic plants.** (A) Seed germination of WT and OE lines on 1/2 MS medium containing different ABA concentrations (0, 2 or 5 μM). (B) Germination rates of the WT and OE lines under 0 or 5 μM ABA treatment conditions. Germination was scored daily. (C) Root elongation of WT and OE plants after treatment with different ABA concentrations (0, 2 or 5 μM). (D) Statistical analysis of the root length. (E) Micrographs showing the stomatal closure of transgenic and WT plants with or without 20 μM ABA treatment. (F) Stomatal closure response to ABA treatment. The data represent the means ± SE of 40 stomata from three independent experiments. (G) ABA contents of WT and OE plants before and after treatment. For drought treatment, 8-week-old OE and WT plants were grown in soil without water for 10 days. For salt treatment, WT and OE plants were irrigated with salt water (200 mM) for 1 month. The values represent the means ± SE of three independent experiments. The different letters above the columns indicate significant differences ( $P < 0.05$ ) according to Duncan's multiple range test.

doi:10.1371/journal.pone.0120646.g007

microscopic analysis of the DAB staining revealed higher  $H_2O_2$  accumulations in the leaves of OE plants than in the leaves of WT plants.

Methyl viologen (MV) is an herbicide that causes chlorophyll degradation and cell membrane leakage through ROS production [47]. This compound was used to examine the potential role of *GhWRKY68* in oxidative stress. As shown in Fig. 9B and 9C, in plants grown on medium containing 2 μM MV, more severe damage and significantly lower cotyledon greening rates occurred in OE plants than in WT plants. These results suggest that the overexpression of *GhWRKY68* increases MV-induced oxidative damage during the germination phase.

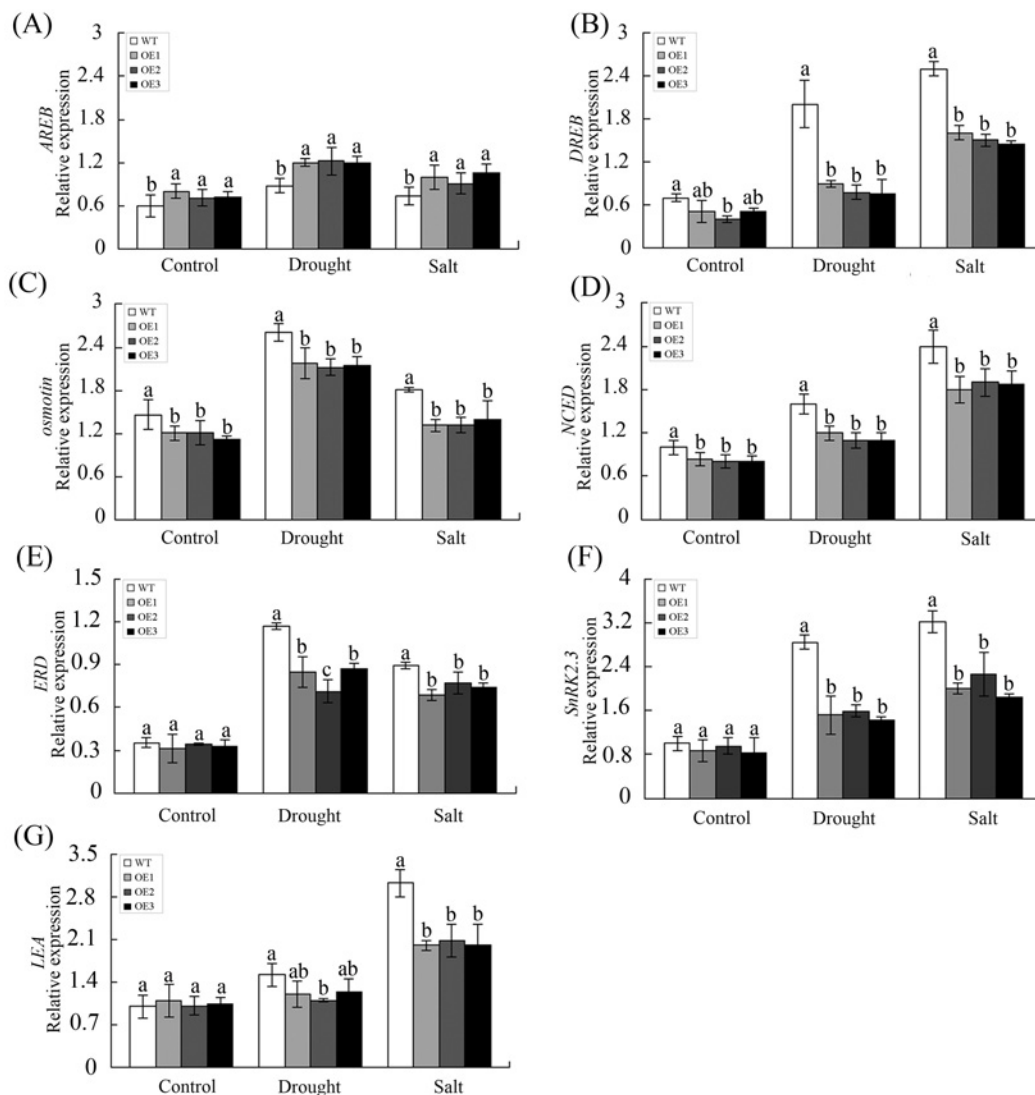

**Fig 8. The expression of ABA-responsive genes under drought and salt stress conditions.** (A) *AREB*, (B) *DREB*, (C) *osmotin*, (D) *NCED*, (E) *ERD*, (F) *SnRK2.3*, and *LEA* (G) correspond to the expression levels of these ABA-responsive genes in WT and OE lines analysed by qPCR. For drought treatment, 8-week-old OE and WT plants were grown in soil without water for 10 days. For salt treatment, WT and OE plants were irrigated with salt water (200 mM) for 1 month. The values represent the means  $\pm$  SE of three independent experiments. The different letters above the columns indicate significant differences ( $P < 0.05$ ) according to Duncan's multiple range test.

doi:10.1371/journal.pone.0120646.g008

### The molecular mechanism by which *GhWRKY68* overexpression decreases oxidative stress tolerance in transgenic plants

To explore the possible mechanisms underlying the decreased tolerance of oxidative stress, several physiological indexes, including antioxidant enzyme activity and the expression of oxidation-related genes, were examined. The basal levels of  $H_2O_2$ , proline and malondialdehyde (MDA) in WT and OE plants were not different in normal conditions (Fig. 10A-C). Under drought and salt stress, the  $H_2O_2$  and MDA contents were dramatically increased in the OE lines compared to the WT plants. In addition, drought and salt stress markedly increased the

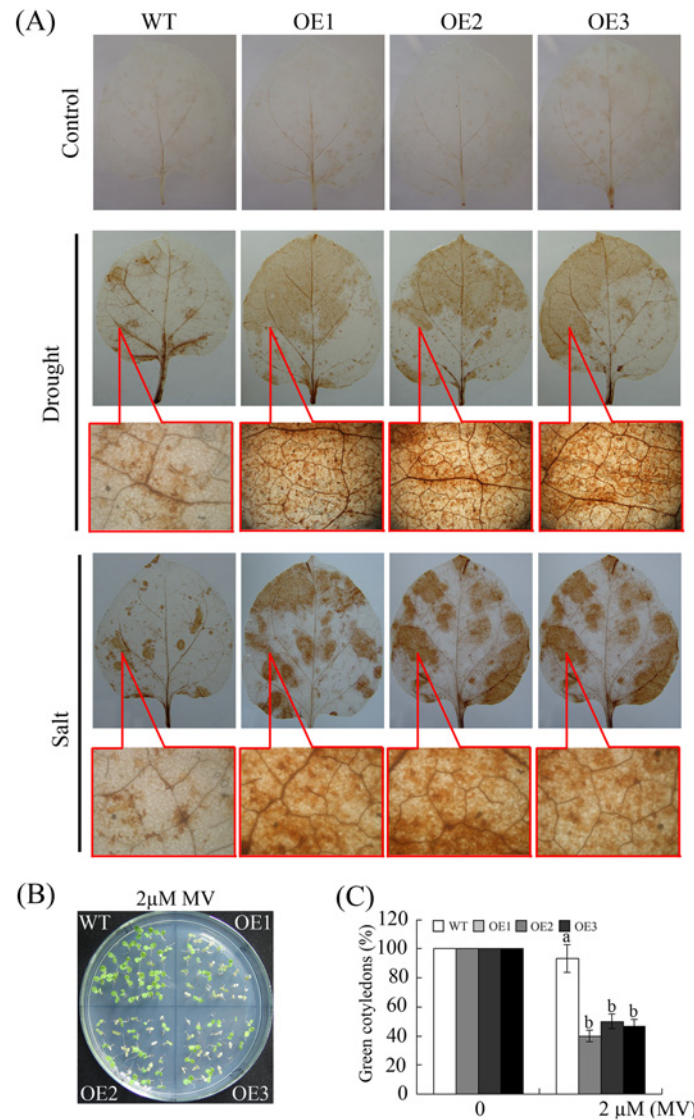

**Fig 9. The constitutive expression of *GhWRKY68* increased ROS production and oxidative damage in transgenic plants.** (A) Representative photographs of  $H_2O_2$  accumulation using DAB staining. For drought and salinity treatments, the top figures show  $H_2O_2$  accumulation, and the bottom figures illustrate the microscopic observations of the brown precipitate. (B) Phenotypes of young seedlings grown on medium containing 2  $\mu$ M MV. (C) Quantification of cotyledon greening in the seedlings described in (B). The data represent the means  $\pm$  SE of three independent experiments. The different letters above the columns in (C) indicate significant differences ( $P < 0.05$ ) according to Duncan's multiple range test performed using SAS version 9.1 software.

doi:10.1371/journal.pone.0120646.g009

proline content in the leaves of the WT and OE plants, but the proline level was higher in WT plants than in the OE plants.

Antioxidative systems play crucial roles in regulating the intracellular ROS balance [48]. The potential role of *GhWRKY68* in oxidative stress was further evaluated by measuring antioxidant enzymatic activities. Three significant antioxidant enzymes, superoxide dismutase (SOD), peroxidase (POD) and catalase (CAT) were monitored before and after treatment (Fig. 10D-F). Under normal growth conditions, the activities of the three antioxidant enzymes were not different in the WT and OE plants. After the drought and salt treatments, the

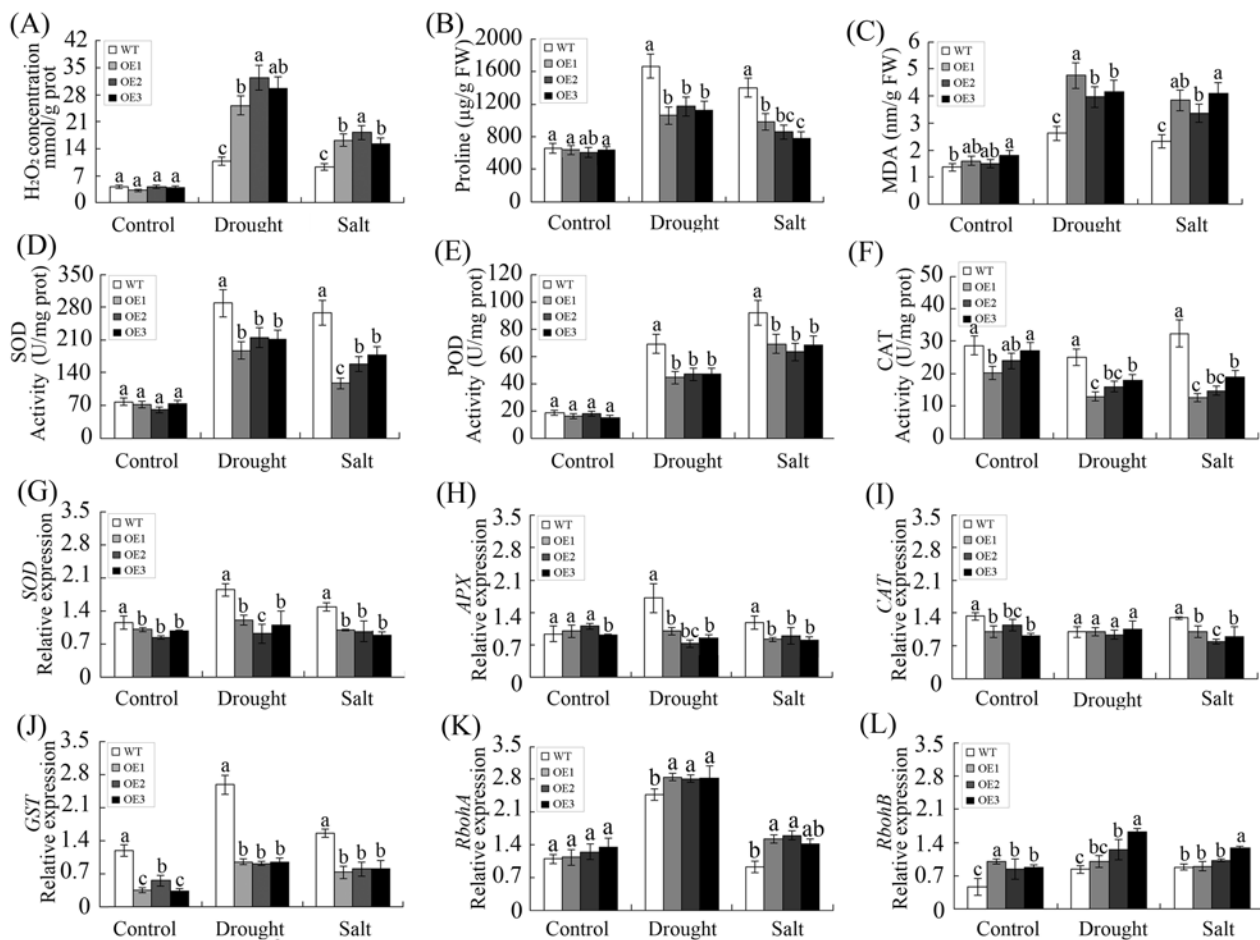

**Fig 10. *GhWRKY68* overexpression decreased oxidative stress tolerance in transgenic plants under drought and salt stress conditions.** (A)  $H_2O_2$  concentration in WT and OE plants under drought and salt treatment. (D) Proline content in WT and OE plants under drought and salt treatment. (C) MDA content in WT and OE plants under drought and salt treatment. (D), (E) and (F) represent SOD, POD and CAT activities, respectively. (G) *SOD*, (H) *APX*, (I) *CAT*, (J) *GST*, (K) *RbohA* and (L) *RbohB* expression levels indicative of ROS-scavenging or ROS-producing genes in WT and OE lines analysed by qPCR. For drought treatment, 8-week-old OE and WT plants were grown in soil without water for 10 days. For salt treatment, WT and OE plants were irrigated with salt water (200 mM) for 1 month. The values represent the means  $\pm$  SE of three independent experiments. The different letters above the columns indicate significant differences ( $P < 0.05$ ) based on Duncan's multiple range tests.

doi:10.1371/journal.pone.0120646.g010

activities of SOD and POD were greatly increased in the WT and OE plants, and the WT plants showed significantly higher SOD and POD activity than the OE plants (Fig. 10D-E). The WT plants displayed a slight increase, and the OE plants displayed a significant decrease in CAT activity after the drought and salt treatment (Fig. 10F).

Furthermore, the transcript levels of several important ROS-related genes were measured by qPCR in WT and OE plants after drought and salt treatment (Fig. 10G-L). The genes chosen included *SOD*, *APX*, *CAT* and *GST*, which encode ROS-scavenging enzymes, and the respiratory burst oxidase homolog genes (*RbohA* and *RbohB*), which encode ROS producers. After drought and salt treatment, the expression patterns of *SOD*, *APX* and *CAT* were only slightly altered in the OE lines, and the transcript accumulation was lower than in WT plants (Fig. 10G-I). However, the expression of *GST* was increased in the OE plants, although it remained lower than in WT plants (Fig. 10J). In addition, the expression levels of *RbohA* and



*RbohB* were markedly elevated in the OE plants and were significantly higher than in the WT plants (Fig. 10K-L).

## Discussion

Although many WRKY genes have been studied over the last decade, our understanding of the regulation and action of the gene family is relatively limited [3]. To date, few WRKY genes have been functionally characterised in cotton (*Gossypium hirsutum*). In the present study, we report, for the first time, a novel group IIc WRKY gene, *GhWRKY68*, which encodes a nuclear-localised protein that specifically binds to the W-box [TTGAC(C/T)] and transactivates the expression of downstream GUS reporter genes in plant leaves. Our results suggest that overexpression of *GhWRKY68* in *Nicotiana benthamiana* remarkably reduces the plants' tolerance to drought and salt stresses through ABA signalling and the regulation of cellular levels of ROS.

Numerous studies have suggested that the regulation of TFs is highly complex, involving transcript and protein levels, DNA binding, subcellular localisation, and other properties through posttranslational mechanisms [3]. The subcellular localisation analysis demonstrated that the *GhWRKY68* protein localised to the nucleus (Fig. 2B). Furthermore, a yeast one-hybrid (Fig. 2D) and transient co-expression experiment (Fig. 2F) demonstrated that *GhWRKY68* specifically binds to the W-box [TTGAC(C/T)] and functions as a transcriptional activator. These observations suggest that *GhWRKY68* may activate the expression of target genes in the nucleus and may participate in various plant processes, forming a network with other genes by binding to the W-box [TTGAC(C/T)] in the promoters of defence-associated genes as well as many WRKY genes [2, 3].

Growing evidence has shown that WRKY proteins are involved in plant responses to various abiotic stresses [13–15]. For example, *WRKY70* and *WRKY54* are negative regulators that modulate osmotic stress tolerance in *Arabidopsis* [12]. Transcript levels of *DgWRKY1* were increased by drought and salt stress in *Chrysanthemum* [49]. In addition, Wang *et al* [50] reported that 15 *VvWRKYs* are involved in the low temperature-related signalling pathways in grapes. We found that *GhWRKY68* transcripts can be induced by abiotic stresses (PEG and NaCl) and by multiple defence-related signalling molecules (ABA and H<sub>2</sub>O<sub>2</sub>) (Fig. 4). Consistent with these observations, GUS staining analyses (Fig. 3C) of drought and salt stressed *GhWRKY68*-overexpressing plants (Fig. 5–6) revealed that *GhWRKY68* plays a role in drought, salt, ABA and ROS stress tolerance, and we speculated that the role of *GhWRKY68* in the plants' response to drought and salt stress depends on modulating ABA signalling and regulating cellular ROS.

ABA is an important phytohormone that inhibits seed germination and seedling growth [51] and mediates plant development and response to various stresses [39]. Drought and salt stresses can induce ABA accumulation by triggering ABA-dependent signalling pathways [40], and an increased ABA content is beneficial for plants under stress conditions [39]. In our study, seed germination and root growth of *GhWRKY68*-overexpressing plants were significantly inhibited by exogenous ABA compared with WT plants (Fig. 7A-D). The *GhWRKY68* transgenic plants were less sensitive to ABA-induced stomata closure (Fig. 7E-F). Moreover, the OE lines accumulated less ABA during drought and salt stress compared with the WT plants (Fig. 7G). All these results indicated that *GhWRKY68* might confer reduced drought and salt tolerance by negatively regulating the ABA pathways. Consistent with these results, *DgWRKY1* was involved in the ABA-dependent signalling pathway under salt stress conditions [49].

Under stress conditions, TFs play important roles by regulating the expression of target genes to enhance plant stress tolerance [3]. For example, *ThWRKY4* activates many genes,

including *ARR15*, *ATCTH*, *EPR1* and *ARR6*, which were previously reported to be involved in stress tolerance [52]. In this study, *GhWRKY68* responded to drought and salt stresses by modulating ABA signalling. Like some other WRKYs, *GhWRKY68* can also regulate the expression of the ABA-responsive genes *AREB*, *DREB*, *osmotin*, *ERD*, *SnRK2.3*, *LEA* and *NCED*, which have been reported to function in the ABA-dependent or ABA-independent pathways [11, 41–44]. In the ABA-dependent pathway, AREB serves as a major ABA-responsive element that can bind and activate the expression of AREB-binding genes. *DREB* is known to regulate the expression of many stress-inducible genes in the ABA-independent pathways. *Osmotin* is responsive to ABA and is involved in the adaptation to low water potential [53]. *ERD*, *SnRK2*, and *LEA* genes were target genes of *AREB* or *DREB* genes [37, 41, 43, 44], which may contain W-box elements in their promoters and be recognized by interacting WRKY proteins through formation of a DNA loop to regulate many genetic processes including transcription regulation [3]. The *NCED* gene encodes 9-cis-epoxycarotenoid dioxygenase, a key enzyme of ABA biosynthesis and a known participant in ABA mediated responses [54]. As shown in Fig. 8A–G, under drought and salt stresses, *NbAREB* was up-regulated, but *NbDREB*, *Nbosmotin*, *NbNCED*, *NbERD*, *NbSnRK2.3*, and *NbLEA* were down-regulated in transgenic plants compared with WT plants. In summary, it is likely that *GhWRKY68* is involved in drought and salt stress through ABA-dependent and ABA-independent signalling pathways.

ROS mainly consist of  $O_2^-$  and  $H_2O_2$  and can be induced in plants by drought and salt stresses [30, 46]. The ROS level is critical for abiotic stress tolerance in plants [31]. Overproduction of  $H_2O_2$  can kill the leaf cells and cause leaf necrosis in plants [55]. Proline contributes to osmotic adjustment and protects macromolecules during dehydration, acting as both an osmotic agent and a radical scavenger. The accumulation of proline may participate in scavenging ROS in response to stress [56, 57]. MDA is the final decomposition product of lipid peroxidation, and the level of MDA reflects the degree of plant damage [58]. In the present study, under drought and salt stresses, the overexpression of *GhWRKY68* enhanced ROS accumulation, reduced the proline content (Fig. 10B) and elevated the MDA content (Fig. 10C). In plants, the most common mechanism for oxidative tolerance is the regulation of the ROS-scavenging enzymes [59]. A subsequent study revealed that the activities of SOD and POD in the *GhWRKY68*-overexpressing plants were lower than those in the WT plants during drought and salt stress (Fig. 10D–E). Furthermore, after drought and salt treatments, the transcript levels of the ROS-related genes *SOD*, *APX*, *CAT* and *GST* were lower, and the activities of SOD, POD and *CAT* decreased (Fig. 10G–L). In addition, the expression levels of *RbohA* and *RbohB* were significantly higher than in WT plants (Fig. 10K–L), resulting in the increase of  $O_2^-$  and  $H_2O_2$ . The increased levels of  $O_2^-$  and  $H_2O_2$  were due, at least in part, to the decreased stress tolerance in transgenic plants. Briefly, these results suggest that *GhWRKY68* might contribute to drought and salt stress by regulating ROS pathways and that the role of *GhWRKY68* in the ROS scavenging pathway is complex.

Over the past several years, a substantial number of WRKYs have been shown to participate in protein–protein interactions, and complex functional interactions have been observed between WRKY proteins and other regulatory proteins (such as MAPKs, VQ proteins, chromatin remodeling proteins, histone deacetylases, 14-3-3 proteins and calmodulin) involved in the modulation of important biological processes [3, 4]. For example, *Arabidopsis* MEKK1 directly interacts with the senescence-related WRKY53 transcription factor at the protein level [60]. In addition, approximately 50% of the VQ proteins interact with the group IIc AtWRKY51 [61]. AtWRKY7 and 10 additional *Arabidopsis* Group IId WRKY proteins can bind to calmodulin (CaM), which is a  $Ca^{2+}$ -binding signalling protein [62]. Moreover, HDAC and histone proteins were recently identified as WRKY-interacting proteins [3]. Mapping of dynamic and complex protein–protein interactions in WRKY-mediated transcription of important target genes is

critical to develop a comprehensive understanding of the WRKY signalling and transcriptional regulatory network [3].

In conclusion, *GhWRKY68* functions as a transcription factor that responds to drought and salt stress by modulating ABA signalling and the regulation of cellular ROS. The modulation of ABA-responsive genes and the activation of ROS-related antioxidant genes and enzymes were partially correlated. It has been reported that cellular ROS levels are regulated through the ABA-triggered regulation of ROS-producing and ROS-scavenging genes [46], but the mechanisms that control ROS signalling through ABA during drought and salt stress remain unclear. Meanwhile, combined with stress signals, *GhWRKY68* may regulate the downstream W-box-containing genes by binding to W-box motifs in the promoters of genes involved in ABA signalling, forming a network with other defence-associated genes. Thus, our findings not only extend knowledge regarding the biological function of the group IIc WRKY proteins but also provide new insights for further manipulation of crop plants to improve stress tolerance.

## Materials and Methods

### Plants materials and treatments

Cotton (*Gossypium hirsutum* L. cv. lumian 22) seeds were germinated and grown in greenhouse conditions at 25°C with a 16 h light/8 h dark cycle (light intensity of 200  $\mu\text{mol m}^{-2} \text{s}^{-1}$ ; relative humidity of 60–75%). Seven-day-old cotton seedlings were subjected to different treatments. For the signalling molecule treatments, seedling leaves were sprayed with 100  $\mu\text{M}$  ABA, or 10 mM  $\text{H}_2\text{O}_2$  as described previously [63]. For the salt and drought treatments, the seedlings were cultured in solutions containing 200 mM NaCl or 15% (w/v) PEG6000. Seedlings without any treatment were used as controls. All the samples were frozen in liquid nitrogen at the appropriate time and stored at -80°C for RNA extraction. Each treatment was repeated at least twice.

*Arabidopsis thaliana* Columbia ecotype (Col-0) and transgenic *Arabidopsis* seeds were sown on 1/2 MS agar medium in a growth chamber at  $22 \pm 1^\circ\text{C}$  with a 16/8 h light/dark cycle and a relative humidity of 80%. For the GUS assays, two-week-old transgenic *Arabidopsis* T<sub>3</sub> seedlings were exposed to 100  $\mu\text{M}$  ABA, 10 mM  $\text{H}_2\text{O}_2$ , 15% (w/v) PEG6000 or 200 mM NaCl. Additionally, *Nicotiana benthamiana* seeds were surface-sterilised and germinated on 1/2 MS agar medium under greenhouse conditions. Then, two- or three-leaf stage seedlings were transplanted into soil and maintained in greenhouse conditions.

### RNA extraction, cDNA synthesis and DNA preparation

An improved CTAB-ammonium acetate method was used for total RNA isolation from cotton according to the method described by Zhao et al [64]. Total RNA was digested with RNase-free DNaseI (Promega, USA) according to the manufacturer's recommendations to remove the genomic DNA. Then, the RNA was used for first-strand cDNA synthesis with reverse transcriptase (TransGen Biotech, China) following the manufacturer's protocol. Genomic DNA was isolated from seedling leaves using the CTAB method described by Porebski et al [65].

### Gene isolation, vector construction and genetic transformation

The *GhWRKY68* cDNA and genomic sequences were isolated as described previously [34]. All of the primers used in this study are listed in S1 Table. Analysis of the amino acid sequence and the promoter sequence of *GhWRKY68* were performed using DNAMAN version 5.2.2 (Lynnon Biosoft, Quebec, Canada) and PlantCARE. The coding region of the gene was inserted into the plant expression vector PBI121 under control of the CaMV 35S promoter. The genetic

transformations with the recombinant plasmids and the production of the transgenic *N. benthamiana* plants were accomplished using the procedures of Zhang et al [66]. The *GhWRKY68* promoter fragment was fused to the GUS reporter gene in the pBI121 binary vector to construct the recombinant plasmid ProGhWRKY68::GUS. The transgenic *Arabidopsis* plants were obtained as described by Shi et al [67]. The transgenic T<sub>3</sub> lines were used for GUS histochemical staining assays to analyse the promoter activity as described by Baumann et al [68].

### Quantitative real-time PCR

Quantitative real-time PCR (qPCR) was performed using the SYBR Premix Ex Taq (TaKaRa, Dalian, China) and the CFX96™ Real-Time PCR Detection System (Bio-Rad, Hercules, CA, USA). The PCR mix was composed of 10 µl SYBR Premix Ex Taq, 1.6 µl of 1:10 diluted cDNA, 0.4 µl of each primer (10 mM), and 7.6 µl PCR grade water in a final volume of 20 µl. The reactions were incubated under the following conditions: 1 cycle of 95°C for 30 sec; 40 cycles at 95°C for 5 sec, 55°C for 15 sec, and 72°C for 15 sec; and then a single melt cycle from 65 to 95°C. Each sample was analysed in triplicate, and the expression levels were calculated using the  $2^{-\Delta\Delta C_t}$  comparative CT method [69]. Three independent experiments were performed. The primers used in qPCR are listed in [S1 Table](#).

### Subcellular localisation analysis of GhWRKY68

To construct the 35S-GhWRKY68::GFP expression plasmid, the *GhWRKY68* coding region without the termination codon was inserted into the binary vector pBI121-GFP, which has a green fluorescence protein (GFP) gene driven by the Cauliflower mosaic virus (CaMV) 35S promoter. For transient expression, the recombined plasmid and the positive control 35S-GFP plasmid were transferred into living onion epidermal cells via the biolistic bombardment transformation method as described by Shi et al [67], using the Biolistic PDS-1000/He system (Bio-Rad, USA) with gold particles (1.0 µl) and a helium pressure of 1,350 psi. The fluorescence was observed using a confocal laser scanning microscope (LSM 510 META, ZEISS, Germany) after the tissues were stained with 100 µg/ml of 4',6-diamidino-2-phenylindole (DAPI) (Solarbio, Beijing, China) in phosphate-buffered saline buffer for 10 min as described previously [34].

### Binding assays using the yeast one-hybrid system

A yeast one-hybrid assay was performed using the Matchmaker Gold Yeast One-Hybrid Library Screening System (Clontech, Palo Alto, CA) for the binding assay. According to the manufacturer's protocol, the reporter vector pAbAi containing triple tandem copies of the W-box (TTGACC) was introduced into the yeast strain Y1HGold, forming a W-box-specific reporter strain used as bait. The pGAD-GhWRKY68 yeast expression vector was formed with the ORF of the *GhWRKY68* fused to the one-hybrid vector pGADT7 with the GAL4 activation domain. Then, pGADT7 and pGAD-GhWRKY68 were transformed into the W-box-specific reporter strain. The cells were plated on SD/-Leu/-Ura medium containing 500 ng/ml AbA to observe yeast growth. The 500 ng/ml AbA completely suppressed the basal expression of the pAbAi-W-box reporter strain in the absence of prey. Mutant W-box (mW-box) (TAGACG) was used as a negative control.

### Co-transfection experiments

The effector plasmid (35S:GhWRKY68) was constructed by inserting the *GhWRKY68* ORF into the binary vector pBI121 and replacing the GUS downstream from the CaMV35S

promoter. For the reporter vector (W-box-35S mini-GUS plasmid), three tandem W-box sequences were fused to the CaMV 35S minimal promoter (W-box-35S mini), which substituted for the CaMV 35S promoter in pBI121GUS (Clontech). The effector and reporter plasmids were introduced into *Agrobacterium tumefaciens* strain GV3101. The *Agrobacterium*-mediated transient transformation assay was performed according to the method described by Yang et al [70].

### Analysis of transgenic plants under salt and drought conditions

For drought treatment, three T<sub>3</sub> generation independent *GhWRKY68*-OE lines (OE1, OE2 and OE3) and wild-type seeds were surface sterilised and plated on 1/2 MS medium with different concentrations of mannitol (0, 100, or 200 mM), and the germination percentage was measured daily. Additionally, water was completely withheld for 10 days from 8-week-old OE and WT plants sown in soil, and the survival rates (the number of surviving plants relative to the total number of treated plants) were recorded after re-watering for 1 week. For the transpiration water loss assay, fully expanded leaves of OE and WT plants were detached and weighed immediately (fresh weight) with an electronic balance at room temperature, and the changes in fresh weight were recorded at designated times thereafter. The rate of water loss was calculated relative to the initial fresh weight. After the drought treatment, stomatal changes were observed by microscopy, and the ratio of stomatal length to width was recorded.

To examine salt tolerance, the seed germination percentage on 1/2 MS medium with different concentrations of NaCl (0, 100, or 200 mM) was measured by the method above. In addition, 8-week-old OE and WT plants were irrigated daily with 200 mM NaCl solution every day for 1 month and maintained under the same growth conditions as described above to record survival rates. Subsequently, the chlorophyll content was measured as described by Lichtenthaler and Wellburn [71]. The drought and salt stress analyses were repeated at least three times.

### ABA sensitivity analysis

To examine the response to ABA, the seeds were sown on 1/2 MS with different concentrations of ABA (0, 2, or 5  $\mu$ M). The seed germination percentages and the root lengths were measured. In addition, a stomatal aperture assay was performed essentially as previously described [72, 73]. The stomatal apertures from the leaves of OE and WT plants treated with 5  $\mu$ M ABA for 3 h were observed using a fluorescence microscope (BX51 Olympus). The ratio of stomatal length to width indicated the degree of stomatal closure. For each treatment, at least 50 stomatal apertures were measured. Endogenous ABA was extracted as described previously [74], and the ABA content was measured using an ELISA kit (Fangcheng, Beijing, China) according to the manufacturer's instructions.

### Oxidative stress analyses

For oxidative damage analyses, the seeds were germinated on 1/2 MS medium supplemented with 5  $\mu$ M methyl viologen (MV), and the cotyledon greening rates were calculated. To detect the accumulation of H<sub>2</sub>O<sub>2</sub> and O<sup>2-</sup>, a histochemical staining procedure was performed using 3, 3'-diaminobenzidine (DAB) according to the method described by Zhang et al [66, 70]. In addition, the H<sub>2</sub>O<sub>2</sub> concentration and MDA content were determined using a hydrogen peroxide test kit and a maleic dialdehyde assay kit (Nanjing Jiancheng Bioengineering Institute), respectively, according to the manufacturer's instructions. The free proline content was monitored as described by Shan et al [75]. These experiments were repeated at least three times. Enzymes were extracted in a phosphate buffer (pH 7.8) and were quantified with the BCA Protein Assay Kit (Nanjing Jiancheng Bioengineering Institute). The antioxidant enzyme activities of

superoxide dismutase (SOD), peroxidase (POD), and catalase (CAT) were measured with kits produced by the Nanjing Jiancheng Institute.

## Statistical analysis

The results are expressed as the mean  $\pm$  standard deviation (SD) of triplicate experiments ( $n = 3$ ). Statistical significance was determined by Duncan's multiple range test with an analysis of variance (ANOVA) using Statistical Analysis System (SAS) version 9.1 (Version 8e, SAS Institute, Cary, NC, USA). The significance was set at  $P < 0.05$ .

## Supporting Information

### S1 Table. Details of the primers used in this study.

(DOC)

**S1 Fig. Identification of transgenic plants.** (A) Evaluation of transgenic plants in the  $T_0$  progeny of transgenic plants by RT-PCR. (B) Analysis of *GhWRKY68* expression in wild-type (WT) and  $T_1$  OE plants.

(TIF)

## Author Contributions

Conceived and designed the experiments: HHJ XQG. Performed the experiments: HHJ CW. Analyzed the data: HHJ FW. Contributed reagents/materials/analysis tools: SCL. Wrote the paper: HHJ CW FW. Drafting the work or revising it critically for important intellectual content: CW FW. Designed the software used in analysis: GLL XQG.

## References

1. Ulker B, Somssich IE (2004) WRKY transcription factors: From DNA binding towards biological function. *Curr Opin Plant Biol.* 7: 491–498. PMID: [15337090](#)
2. Eulgem T, Somssich IE (2007) Networks of WRKY transcription factors in defense signaling. *Curr Opin Plant Biol.* 10: 366–371. PMID: [17644023](#)
3. Chi YJ, Yang Y, Zhou Y, Zhou J, Fan BF, Yu JQ, et al. (2013) Protein-protein interactions in the regulation of WRKY transcription factors. *Mol Plant.* 6: 287–300. doi: [10.1093/mp/sst026](#) PMID: [23455420](#)
4. Rushton PJ, Somssich IE, Ringler P, Shen QJ (2010) WRKY transcription factors. *Trends Plant Sci.* 15: 247–258. doi: [10.1016/j.tplants.2010.02.006](#) PMID: [20304701](#)
5. Ren X, Chen Z, Liu Y, Zhang H, Zhang M, Liu Q, et al. (2010) ABO3, a WRKY transcription factor, mediates plant responses to abscisic acid and drought tolerance in *Arabidopsis*. *Plant J.* 63: 417–429. doi: [10.1111/j.1365-313X.2010.04248.x](#) PMID: [20487379](#)
6. Ding ZJ, Yan JY, Li GX, Wu ZC, Zhang SQ, Zheng SJ, et al. (2014) WRKY41 controls *Arabidopsis* seed dormancy via direct regulation of *ABI3* transcript levels not downstream of ABA. *Plant J.* 79: 810–823. doi: [10.1111/tbj.12597](#) PMID: [24946881](#)
7. Wang YN, Dang FF, Liu ZQ, Wang X, Eulgem T, Lai Y, et al. (2013) CaWRKY58, encoding a group I WRKY transcription factor of *Capsicum annuum*, negatively regulates resistance to *Ralstonia solanacearum* infection. *Mol Plant Pathol.* 14 (2): 131–144. doi: [10.1111/j.1364-3703.2012.00836.x](#) PMID: [23057972](#)
8. Wei KF, Chen J, Chen YF, Wu LJ, Xie DX (2012) Molecular phylogenetic and expression analysis of the complete WRKY transcription factor family in maize. *DNA Res.* 19: 153–164. doi: [10.1093/dnares/dsr048](#) PMID: [22279089](#)
9. Besseau S, Li J, Palva ET (2012) WRKY54 and WRKY70 co-operate as negative regulators of leaf senescence in *Arabidopsis thaliana*. *J Exp Bot.* 63: 2667–2679. doi: [10.1093/jxb/err450](#) PMID: [22268143](#)
10. Wang Z, Fang HD, Chen Y, Chen KP, Li GY, Gu SL, et al. (2014) Overexpression of *BnWRKY33* in oil-seed rape enhances resistance to *Sclerotinia sclerotiorum*. *Mol plant pathol.* 15 (7): 677–689. doi: [10.1111/mp.12123](#) PMID: [24521393](#)

11. Dang FF, Wang YN, Yu L, Eugem T, Lai Y, Liu ZQ, et al. (2013) CaWRKY40, a WRKY protein of pepper, plays an important role in the regulation of tolerance to heat stress and resistance to *Ralstonia solanacearum* infection. *Plant Cell Environ.* 36: 757–774. doi: [10.1111/pce.12011](https://doi.org/10.1111/pce.12011) PMID: [22994555](https://pubmed.ncbi.nlm.nih.gov/22994555/)
12. Li J, Besseau S, Törönen P, Sipari N, Kollist H, Holm L, et al. (2013) Defense-related transcription factors WRKY70 and WRKY54 modulate osmotic stress tolerance by regulating stomatal aperture in *Arabidopsis*. *New Phytol.* 200: 457–472. doi: [10.1111/nph.12378](https://doi.org/10.1111/nph.12378) PMID: [23815736](https://pubmed.ncbi.nlm.nih.gov/23815736/)
13. Chen LG, Song Y, Li SJ, Zhang LP, Zou CS, Yu DQ (2012) The role of WRKY transcription factors in plant abiotic stresses. *BBA-Gene Regul Mech.* 1819: 120–128.
14. Jiang YJ, Liang G, Yu DQ (2012) Activated expression of WRKY57 confers drought tolerance in *Arabidopsis*. *Mol Plant.* 5: 1375–1388. doi: [10.1093/mp/sss080](https://doi.org/10.1093/mp/sss080) PMID: [22930734](https://pubmed.ncbi.nlm.nih.gov/22930734/)
15. Rushton DL, Tripathi P, Rabara RC, Lin J, Ringle P, Boken AK, et al. (2012) WRKY transcription factors: key components in abscisic acid signalling. *Plant Biotechnol J.* 10: 2–11. doi: [10.1111/j.1467-7652.2011.00634.x](https://doi.org/10.1111/j.1467-7652.2011.00634.x) PMID: [21696534](https://pubmed.ncbi.nlm.nih.gov/21696534/)
16. Li SJ, Fu QT, Chen LG, Huang WD, Yu DQ (2011) *Arabidopsis thaliana* WRKY25, WRKY26, and WRKY33 coordinate induction of plant thermotolerance. *Planta.* 233: 1237–1252. doi: [10.1007/s00425-011-1375-2](https://doi.org/10.1007/s00425-011-1375-2) PMID: [21336597](https://pubmed.ncbi.nlm.nih.gov/21336597/)
17. Niu CF, Wei W, Zhou QY, Tian AG, Hao YJ, Zhang WK, et al. (2012) Wheat WRKY genes *TaWRKY2* and *TaWRKY19* regulate abiotic stress tolerance in transgenic *Arabidopsis* plants. *Plant Cell Environ.* 35: 1156–1170. doi: [10.1111/j.1365-3040.2012.02480.x](https://doi.org/10.1111/j.1365-3040.2012.02480.x) PMID: [22220579](https://pubmed.ncbi.nlm.nih.gov/22220579/)
18. Zhou QY, Tian AG, Zou HF, Xie ZM, Lei G, Huang J, et al. (2008) Soybean WRKY-type transcription factor genes, *GmWRKY13*, *GmWRKY21*, and *GmWRKY54*, confer differential tolerance to abiotic stresses in transgenic *Arabidopsis* plants. *Plant Biotechnol J.* 6: 486–503. doi: [10.1111/j.1467-7652.2008.00336.x](https://doi.org/10.1111/j.1467-7652.2008.00336.x) PMID: [18384508](https://pubmed.ncbi.nlm.nih.gov/18384508/)
19. Ren XZ, Chen ZZ, Liu Y, Zhang HR, Zhang M, Liu Q, et al. (2010) ABO3, a WRKY transcription factor, mediates plant responses to abscisic acid and drought tolerance in *Arabidopsis*. *Plant J.* 63: 417–429. doi: [10.1111/j.1365-3113X.2010.04248.x](https://doi.org/10.1111/j.1365-3113X.2010.04248.x) PMID: [20487379](https://pubmed.ncbi.nlm.nih.gov/20487379/)
20. Tao Z, Kou YJ, Liu HB, Li XH, Xiao JH, Wang SP (2011) OsWRKY45 alleles play different roles in abscisic acid signalling and salt stress tolerance but similar roles in drought and cold tolerance in rice. *J Exp Bot.* 62(14): 4863–4874. doi: [10.1093/jxb/err144](https://doi.org/10.1093/jxb/err144) PMID: [21725029](https://pubmed.ncbi.nlm.nih.gov/21725029/)
21. Yan HR, Jia HH, Chen XB, Hao LL, An HL, Guo XQ (2014) The Cotton WRKY Transcription Factor GhWRKY17 Functions in Drought and Salt Stress in Transgenic *Nicotiana benthamiana* through ABA Signalling and the Modulation of Reactive Oxygen Species Production. *Plant Cell Physiol.* 55(12): 2060–2076. doi: [10.1093/pcp/pcu133](https://doi.org/10.1093/pcp/pcu133) PMID: [25261532](https://pubmed.ncbi.nlm.nih.gov/25261532/)
22. Cutler SR, Rodriguez PL, Finkelstein RR, Abrams SR (2010) Abscisic acid: emergence of a core signalling network. *Annu Rev Plant Biol.* 61: 651–679. doi: [10.1146/annurev-arplant-042809-112122](https://doi.org/10.1146/annurev-arplant-042809-112122) PMID: [20192755](https://pubmed.ncbi.nlm.nih.gov/20192755/)
23. Raghavendra AS, Gonugunta VK, Christmann A, Grill E (2010) ABA perception and signalling. *Trends Plant Sci.* 15: 395–401. doi: [10.1016/j.tplants.2010.04.006](https://doi.org/10.1016/j.tplants.2010.04.006) PMID: [20493758](https://pubmed.ncbi.nlm.nih.gov/20493758/)
24. Fujii H, Chinnusamy V, Rodrigues A, Rubio S, Antoni R, Park SY, et al. (2009) In vitro reconstitution of an abscisic acid signalling pathway. *Nature.* 462: 660–664. doi: [10.1038/nature08599](https://doi.org/10.1038/nature08599) PMID: [19924127](https://pubmed.ncbi.nlm.nih.gov/19924127/)
25. Ma Y, Szostkiewicz I, Korte A, Moes D, Yang Y, Christmann A, et al. (2009) Regulators of PP2C phosphatase activity function as abscisic acid sensors. *Science.* 324: 1064–1068. doi: [10.1126/science.1172408](https://doi.org/10.1126/science.1172408) PMID: [19407143](https://pubmed.ncbi.nlm.nih.gov/19407143/)
26. Pei ZM, Murata Y, Benning G, Thomine S, Klusener B, Allen GJ, et al. (2000) Calcium channels activated by hydrogen peroxide mediate abscisic acid signalling in guard cells. *Nature.* 406: 731–734. PMID: [10963598](https://pubmed.ncbi.nlm.nih.gov/10963598/)
27. Zhang X, Wang H, Takemiya A, Song CP, Kinoshita T, Shimazaki K (2004) Inhibition of blue light-dependent H<sup>+</sup> pumping by abscisic acid through hydrogen peroxide-induced dephosphorylation of the plasma membrane H<sup>+</sup>-ATPase in guard cell protoplasts. *Plant Physiol.* 136: 4150–4158. PMID: [15563626](https://pubmed.ncbi.nlm.nih.gov/15563626/)
28. Apel K, Hirt H (2004) Reactive oxygen species: metabolism, oxidative stress, and signal transduction. *Annu Rev Plant Biol.* 55: 373–399. PMID: [15377225](https://pubmed.ncbi.nlm.nih.gov/15377225/)
29. Miller G, Suzuki N, Ciftci-Yilmaz S, Mittler R (2010) Reactive oxygen species homeostasis and signalling during drought and salinity stresses. *Plant Cell Environ.* 33: 453–457. doi: [10.1111/j.1365-3040.2009.02041.x](https://doi.org/10.1111/j.1365-3040.2009.02041.x) PMID: [19712065](https://pubmed.ncbi.nlm.nih.gov/19712065/)
30. Krasensky J, Jonak C (2012) Drought, salt, and temperature stress-induced metabolic rearrangements and regulatory networks. *J Exp Bot.* 63: 1593–1608. doi: [10.1093/jxb/err460](https://doi.org/10.1093/jxb/err460) PMID: [22291134](https://pubmed.ncbi.nlm.nih.gov/22291134/)
31. Zhang X, Wang L, Meng H, Wen HT, Fan Y, Zhao J (2011) Maize *ABP9* enhances tolerance to multiple stresses in transgenic *Arabidopsis* by modulating ABA signaling and cellular levels of reactive oxygen species. *Plant Mol Biol.* 75: 365–378. doi: [10.1007/s11103-011-9732-x](https://doi.org/10.1007/s11103-011-9732-x) PMID: [21327835](https://pubmed.ncbi.nlm.nih.gov/21327835/)

32. Jed AC, Danny JL, Elizabeth SD, Iain WW (2010) Global gene expression responses to waterlogging in roots and leaves of Cotton (*Gossypium hirsutum* L.). *Plant Cell Physiol* 51(1): 21–37. doi: [10.1093/pcp/pcp163](https://doi.org/10.1093/pcp/pcp163) PMID: [19923201](https://pubmed.ncbi.nlm.nih.gov/19923201/)
33. Smith CW, Cothren JT (1999) Cotton: origin, history, technology and production. Wiley, New York
34. Shi J, Zhang L, An HL, Wu CA, Guo XQ (2011) GhMPK16, a novel stress-responsive group D MAPK gene from cotton, is involved in disease resistance and drought sensitivity. *BMC Mol. Biol.* 12: 22. doi: [10.1186/1471-2199-12-22](https://doi.org/10.1186/1471-2199-12-22) PMID: [21575189](https://pubmed.ncbi.nlm.nih.gov/21575189/)
35. Urao T, Noji M, Yamaguchi-Shinozaki K, Shinozaki K (1996) A transcriptional activation domain of ATMYB2, a drought-inducible *Arabidopsis* Myb-related protein. *Plant J.* 10 (6): 1145–8. PMID: [9011094](https://pubmed.ncbi.nlm.nih.gov/9011094/)
36. Yoshida T, Mogami J, Yamaguchi-Shinozaki K (2014) ABA-dependent and ABA-independent signaling in response to osmotic stress in plants. *Curr Opin Plant Biol.* 21:133–139. doi: [10.1016/j.pbi.2014.07.009](https://doi.org/10.1016/j.pbi.2014.07.009) PMID: [25104049](https://pubmed.ncbi.nlm.nih.gov/25104049/)
37. Fujita M, Fujita Y, Noutoshi Y, Takahashi F, Narusaka Y, Yamaguchi-Shinozaki K, et al. (2006) Cross-talk between abiotic and biotic stress responses: a current view from the points of convergence in the stress signaling networks. *Curr Opin Plant Biol.* 9: 436–442. PMID: [16759898](https://pubmed.ncbi.nlm.nih.gov/16759898/)
38. Yehoram L, Yael G, Yuval K, Alex L (2010) Reduced expression of the v-SNAREs AtVAMP71/AtVAMP7C gene family in *Arabidopsis* reduces drought tolerance by suppression of abscisic acid-dependent stomatal closure. *J Exp Bot.* 61: 2615–2622. doi: [10.1093/jxb/erq099](https://doi.org/10.1093/jxb/erq099) PMID: [20423938](https://pubmed.ncbi.nlm.nih.gov/20423938/)
39. Xiong L, Wang RG, Mao G, Koczan JM (2006) Identification of drought tolerance determinants by genetic analysis of root response to drought stress and abscisic acid. *Plant Physiol.* 142: 1065–1074. PMID: [16963523](https://pubmed.ncbi.nlm.nih.gov/16963523/)
40. Zhu JK (2002) Salt and drought stress signal transduction in plants. *Annu Rev Plant Biol.* 53: 247–273. PMID: [12221975](https://pubmed.ncbi.nlm.nih.gov/12221975/)
41. Shinozaki K, Yamaguchi-Shinozaki K (2007) Gene networks involved in drought stress response and tolerance. *J Exp Bot.* 58: 221–227. PMID: [17075077](https://pubmed.ncbi.nlm.nih.gov/17075077/)
42. Luo X, Cui N, Zhu YM, Cao L, Zhai H, Cai H, et al. (2012) Over-expression of GsZFP1, an ABA-responsive C<sub>2</sub>H<sub>2</sub>-type zinc finger protein lacking a QALGGH motif, reduces ABA sensitivity and decreases stomata size. *J Plant Physiol.* 169: 1192–1202. doi: [10.1016/j.jplph.2012.03.019](https://doi.org/10.1016/j.jplph.2012.03.019) PMID: [22705253](https://pubmed.ncbi.nlm.nih.gov/22705253/)
43. Fujita Y, Fujita M, Satoh R, Maruyama K, Parvez MM, Seki M, et al. (2005) AREB1 is a transcription activator of novel ABRE dependent ABA signaling that enhances drought stress tolerance in *Arabidopsis*. *Plant Cell.* 17: 3470–3488. PMID: [16284313](https://pubmed.ncbi.nlm.nih.gov/16284313/)
44. Yoshida T, Fujita Y, Maruyama K, Mogami J, Todaka D, Shinozaki K, et al. (2015) Four *Arabidopsis* AREB/ABF transcription factors function predominantly in gene expression downstream of SnRK2 kinases in abscisic acid signalling in response to osmotic stress. *Plant Cell Environ.* 38 (1): 35–49. doi: [10.1111/pce.12351](https://doi.org/10.1111/pce.12351) PMID: [24738645](https://pubmed.ncbi.nlm.nih.gov/24738645/)
45. Bhattacharjee S (2005) Reactive oxygen species and oxidative burst: roles in stress, senescence and signal transduction in plants. *Curr Sci.* 89: 1113–1121.
46. Abbasi AR, Hajirezaei M, Hofius D, Sonnewald U, Voll LM (2007) Specific roles of alpha- and gamma-tocopherol in abiotic stress responses of transgenic tobacco. *J Plant Physiol.* 143: 1720–1738. PMID: [17293434](https://pubmed.ncbi.nlm.nih.gov/17293434/)
47. Kurepa J, Smalle J, Van MM, Inze D (1998) Oxidative stress tolerance and longevity in *Arabidopsis*: the late-flowering mutant gigantea is tolerant to paraquat. *Plant J.* 14: 759–764. PMID: [9681039](https://pubmed.ncbi.nlm.nih.gov/9681039/)
48. Jia HH, Sun RJ, Shi WN, Yan Y, Li H, Guo XQ, et al. (2014) Characterization of a mitochondrial manganese superoxide dismutase gene from *Apis cerana cerana* and its role in oxidative stress. *J Insect Physiol.* 60: 68–79. doi: [10.1016/j.jinsphys.2013.11.004](https://doi.org/10.1016/j.jinsphys.2013.11.004) PMID: [24269344](https://pubmed.ncbi.nlm.nih.gov/24269344/)
49. Liu QL, Xu KD, Pan YZ, Jiang BB, Liu GL, Jia Y, et al. (2014) Functional analysis of a novel *Chrysanthemum* WRKY transcription factor gene involved in salt tolerance. *Plant Mol Biol Rep.* 32: 282–289.
50. Wang LN, Zhu W, Fang LC, Sun XM, Su LY, Liang ZC, et al. (2014) Genome-wide identification of WRKY family genes and their response to cold stress in *Vitis vinifera*. *BMC Plant Biol.* 14: 103. doi: [10.1186/1471-2229-14-103](https://doi.org/10.1186/1471-2229-14-103) PMID: [24755338](https://pubmed.ncbi.nlm.nih.gov/24755338/)
51. Finkelstein RR, Gampala SSL, Rock CD (2002) Abscisic acid signaling in seeds and seedlings. *Plant Cell.* 14: S15–S45. PMID: [12045268](https://pubmed.ncbi.nlm.nih.gov/12045268/)
52. Zheng L, Liu GF, Meng XN, Liu YJ, Ji XY, Li YB, et al. (2013) A WRKY gene from *Tamarix hispida*, ThWRKY4, mediates abiotic stress responses by modulating reactive oxygen species and expression of stress-responsive genes. *Plant Mol Biol.* 82 (4–5): 303–20. doi: [10.1007/s11103-013-0068-6](https://doi.org/10.1007/s11103-013-0068-6) PMID: [23657790](https://pubmed.ncbi.nlm.nih.gov/23657790/)
53. Singh NK, Nelson DE, Kuhn D, Hasegawa PM, Bressan RA (1989) Molecular cloning of osmotin and regulation of its expression by ABA and adaptation to low water potential. *Plant Physiol.* 90: 1096–1101. PMID: [16666857](https://pubmed.ncbi.nlm.nih.gov/16666857/)



54. Barrero JM, Rodriguez PL, Quesada V, Piqueras P, Ponce MR, Micol JL (2006) Both abscisic acid (ABA)-dependent and ABA-independent pathways govern the induction of NCED3, AAO3 and ABA1 in response to salt stress. *Plant Cell Environ.* 29: 2000–8. PMID: [16930325](#)
55. Zheng HQ, Wei N, Wang LF, He P (2006) Effects of Lantana camara leaf extract on the activity of superoxide dismutase and accumulation of H<sub>2</sub>O<sub>2</sub> in water hyacinth leaf. *J Plant Physiol and Mol Biol.* 32 (2): 189–194.
56. Rejeb KB, Abdelly C, Savouré A (2014) How reactive oxygen species and proline face stress together. *Plant Physiol Bioch.* 80: 278–284. doi: [10.1016/j.plaphy.2014.04.007](#) PMID: [24813727](#)
57. Polavarapu B, Kavi K, Nese S (2014) Is proline accumulation per se correlated with stress tolerance or is proline homeostasis a more critical issue? *Plant Cell Environ.* 37: 300–311. doi: [10.1111/pce.12157](#) PMID: [23790054](#)
58. Yoshimura K, Miyao K, Gaber A, Takeda T, Kanaboshi H, Miyasaka H, et al. (2004) Enhancement of stress tolerance in transgenic tobacco plants overexpressing *Chlamydomonas* glutathione peroxidase in chloroplasts or cytosol. *Plant J.* 37(1): 21–33. PMID: [14675429](#)
59. Gao S, Ouyang C, Wang S, Xu Y, Tang L, Chen F (2008) Effects of salt stress on growth, antioxidant enzyme and phenylalanine ammonia-lyase activities in *Jatropha curcas* L. seedlings. *Plant Soil Environ.* 54: 374–381.
60. Miao Y, Laun TM, Smykowski A, Zentgraf U (2007) *Arabidopsis* MEKK1 can take a short cut: it can directly interact with senescence-related WRKY53 transcription factor on the protein level and can bind to its promoter. *Plant Mol Biol.* 65: 63–76. PMID: [17587183](#)
61. Cheng Y, Zhou Y, Yang Y, Chi YJ, Zhou J, Chen JY, et al. (2012) Structural and functional analysis of VQ motif-containing proteins in *Arabidopsis* as interacting proteins of WRKY transcription factors. *Plant Physiol.* 159, 810–825. doi: [10.1104/pp.112.196816](#) PMID: [22535423](#)
62. Park CY, Lee JH, Yoo JH, Moon BC, Choi MS, Kang YH, et al. (2005) WRKY Group IIId transcription factors interact with calmodulin. *FEBS Lett.* 579, 1545–1550. PMID: [15733871](#)
63. Yu FF, Huaxia YF, Lu WJ, Wu CG, Gao XC, Guo XQ (2012) GhWRKY15, a member of the WRKY transcription factor family identified from cotton (*Gossypium hirsutum* L.), is involved in disease resistance and plant development. *BMC Plant Biol.* 12: 144. doi: [10.1186/1471-2229-12-144](#) PMID: [22883108](#)
64. Zhao L, Ding Q, Zeng J, Wang FR, Zhang J, Fan SJ, et al. (2011) An improved CTAB–ammonium acetate method for total RNA isolation from cotton. *Phytochem Analysis.* 23: 647–650.
65. Porebski S, Bailey LG, Baum BR (1997) Modification of a CTAB DNA extraction protocol for plants containing high polysaccharide and polyphenol components. *Plant Molecular Biology Reports.* 15: 8–15.
66. Zhang L, Li YZ, Lu WJ, Meng F, Wu CA, Guo XQ. (2012) Cotton *GhMCK5* affects disease resistance, induces HR-like cell death, and reduces the tolerance to salt and drought stress in transgenic *Nicotiana benthamiana*. *J. Exp. Bot.* 63: 3935–3951. doi: [10.1093/jxb/ers086](#) PMID: [22442420](#)
67. Shi J, An HL, Zhang L, Gao Z, Guo XQ (2010) *GhMPK7*, a novel multiple stress-responsive cotton group C MAPK gene, has a role in broad spectrum disease resistance and plant development. *Plant Mol Biol.* 74: 1–17. doi: [10.1007/s11103-010-9661-0](#) PMID: [20602149](#)
68. Baumann K, De Paolis A, Costantino P, Gualberti G (1999) The DNA binding site of the Dof protein NtBBF1 is essential for tissue-specific and auxin-regulated expression of the rolB oncogene in plants. *Plant Cell.* 11: 323–334. PMID: [10072394](#)
69. Livak KJ, Schmittgen TD (2001) Analysis of relative gene expression data using real-time quantitative PCR and the 2<sup>-ΔΔC<sub>T</sub></sup> Method. *Method.* 25: 402–408.
70. Yang Y, Li R, Qi M (2000) In vivo analysis of plant promoters and transcription factors by agroinfiltration of tobacco leaves. *Plant J.* 22: 543–551. PMID: [10886774](#)
71. Lichtenthaler H, Wellburn A (1983) Determination of total carotenoids and chlorophyll a and b of leaf extract in different solvents. *Biochem Soc T.* 603: 591–592.
72. Zhang L, Xi DM, Luo L, Meng F, Li YZ, Wu CA, et al. (2011) Cotton *GhMPK2* is involved in multiple signaling pathways and mediates defense responses to pathogen infection and oxidative stress. *FEBS J.* 278: 1367–1378. doi: [10.1111/j.1742-4658.2011.08056.x](#) PMID: [21338470](#)
73. Chen Z, Zhang H, Jablonowski D, Zhou X, Ren X, Hong X, et al. (2006) Mutations in ABO1/ELO2, a subunit of holo-Elongator, increase abscisic acid sensitivity and drought tolerance in *Arabidopsis thaliana*. *Mol Cell Biol.* 26: 6902–6912. PMID: [16943431](#)
74. Olivella C, Vendrell M, Save R (1998) Abscisic acid and ethylene content in *Gerbera jamesonii* plants submitted to drought and rewatering. *Biol Planta.* 4: 613–616.
75. Shan DP, Huang JG, Yang YT, Guo YH, Wu CA, Yang GD, et al. (2007) Cotton *GhDREB1* increases plant tolerance to low temperature and is negatively regulated by gibberellic acid. *New Phytol.* 176: 70–81. PMID: [17803642](#)
